# Supplementary material for: Phylogenetic analysis, structural evolution and functional divergence of the 12-oxo-phytodienoate acid reductase gene family in plants
Source: PubMed Central journal article supplement (PMC2688005; doi:10.1186/1471-2148-9-90), 2009-05-05
Supplement: 1471-2148-9-90-S3.pdf [file 1471-2148-9-90-S3.pdf]

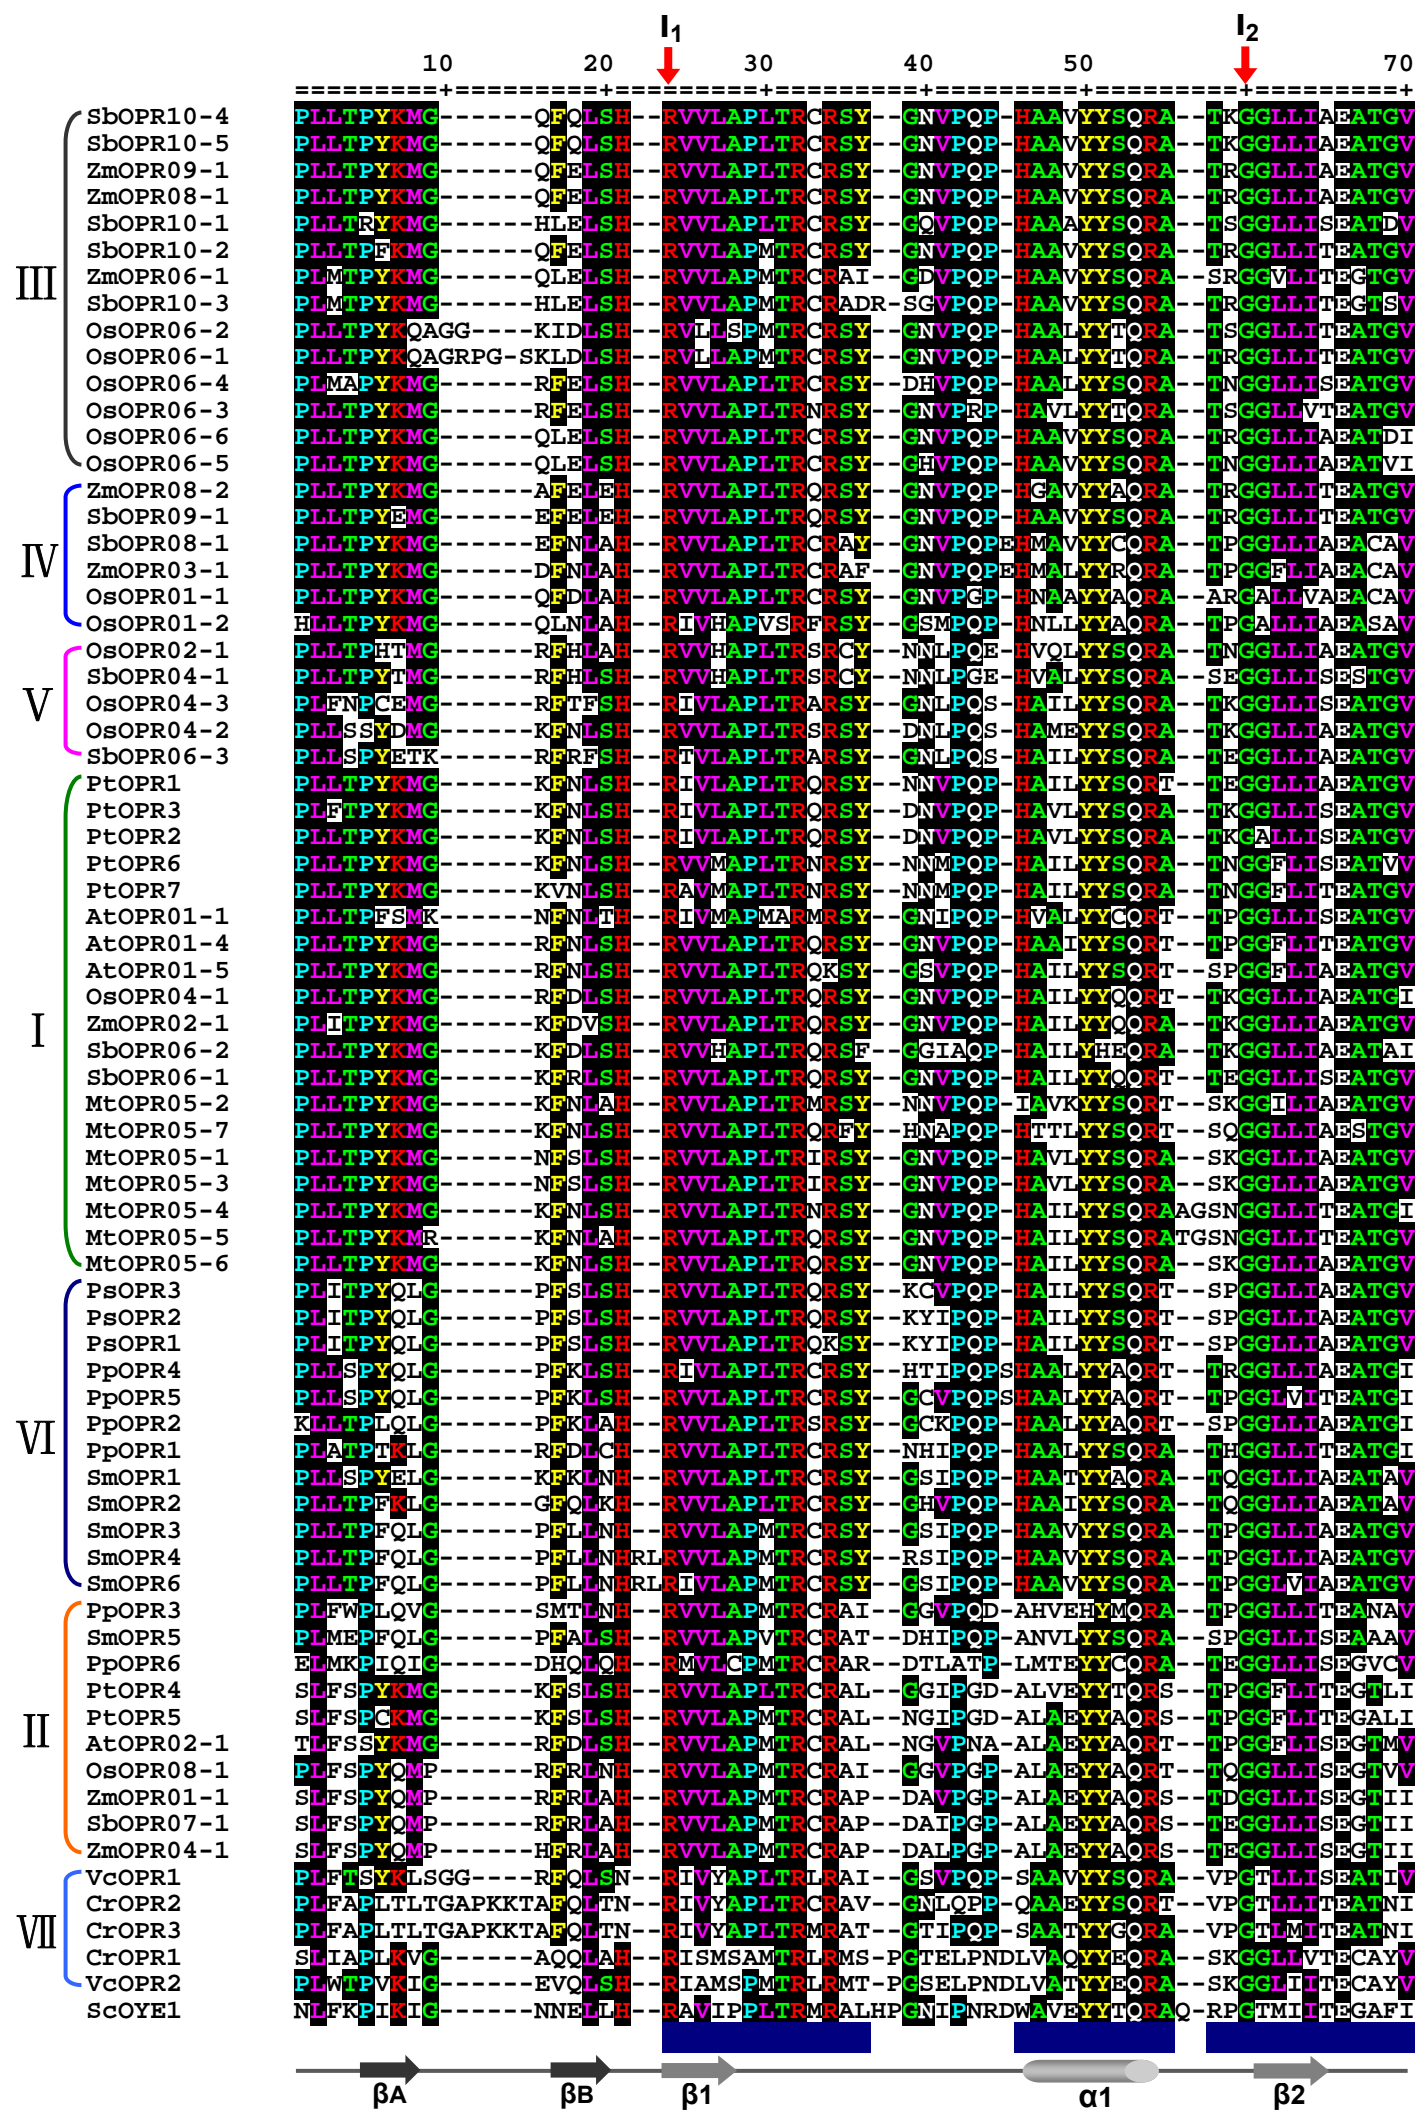

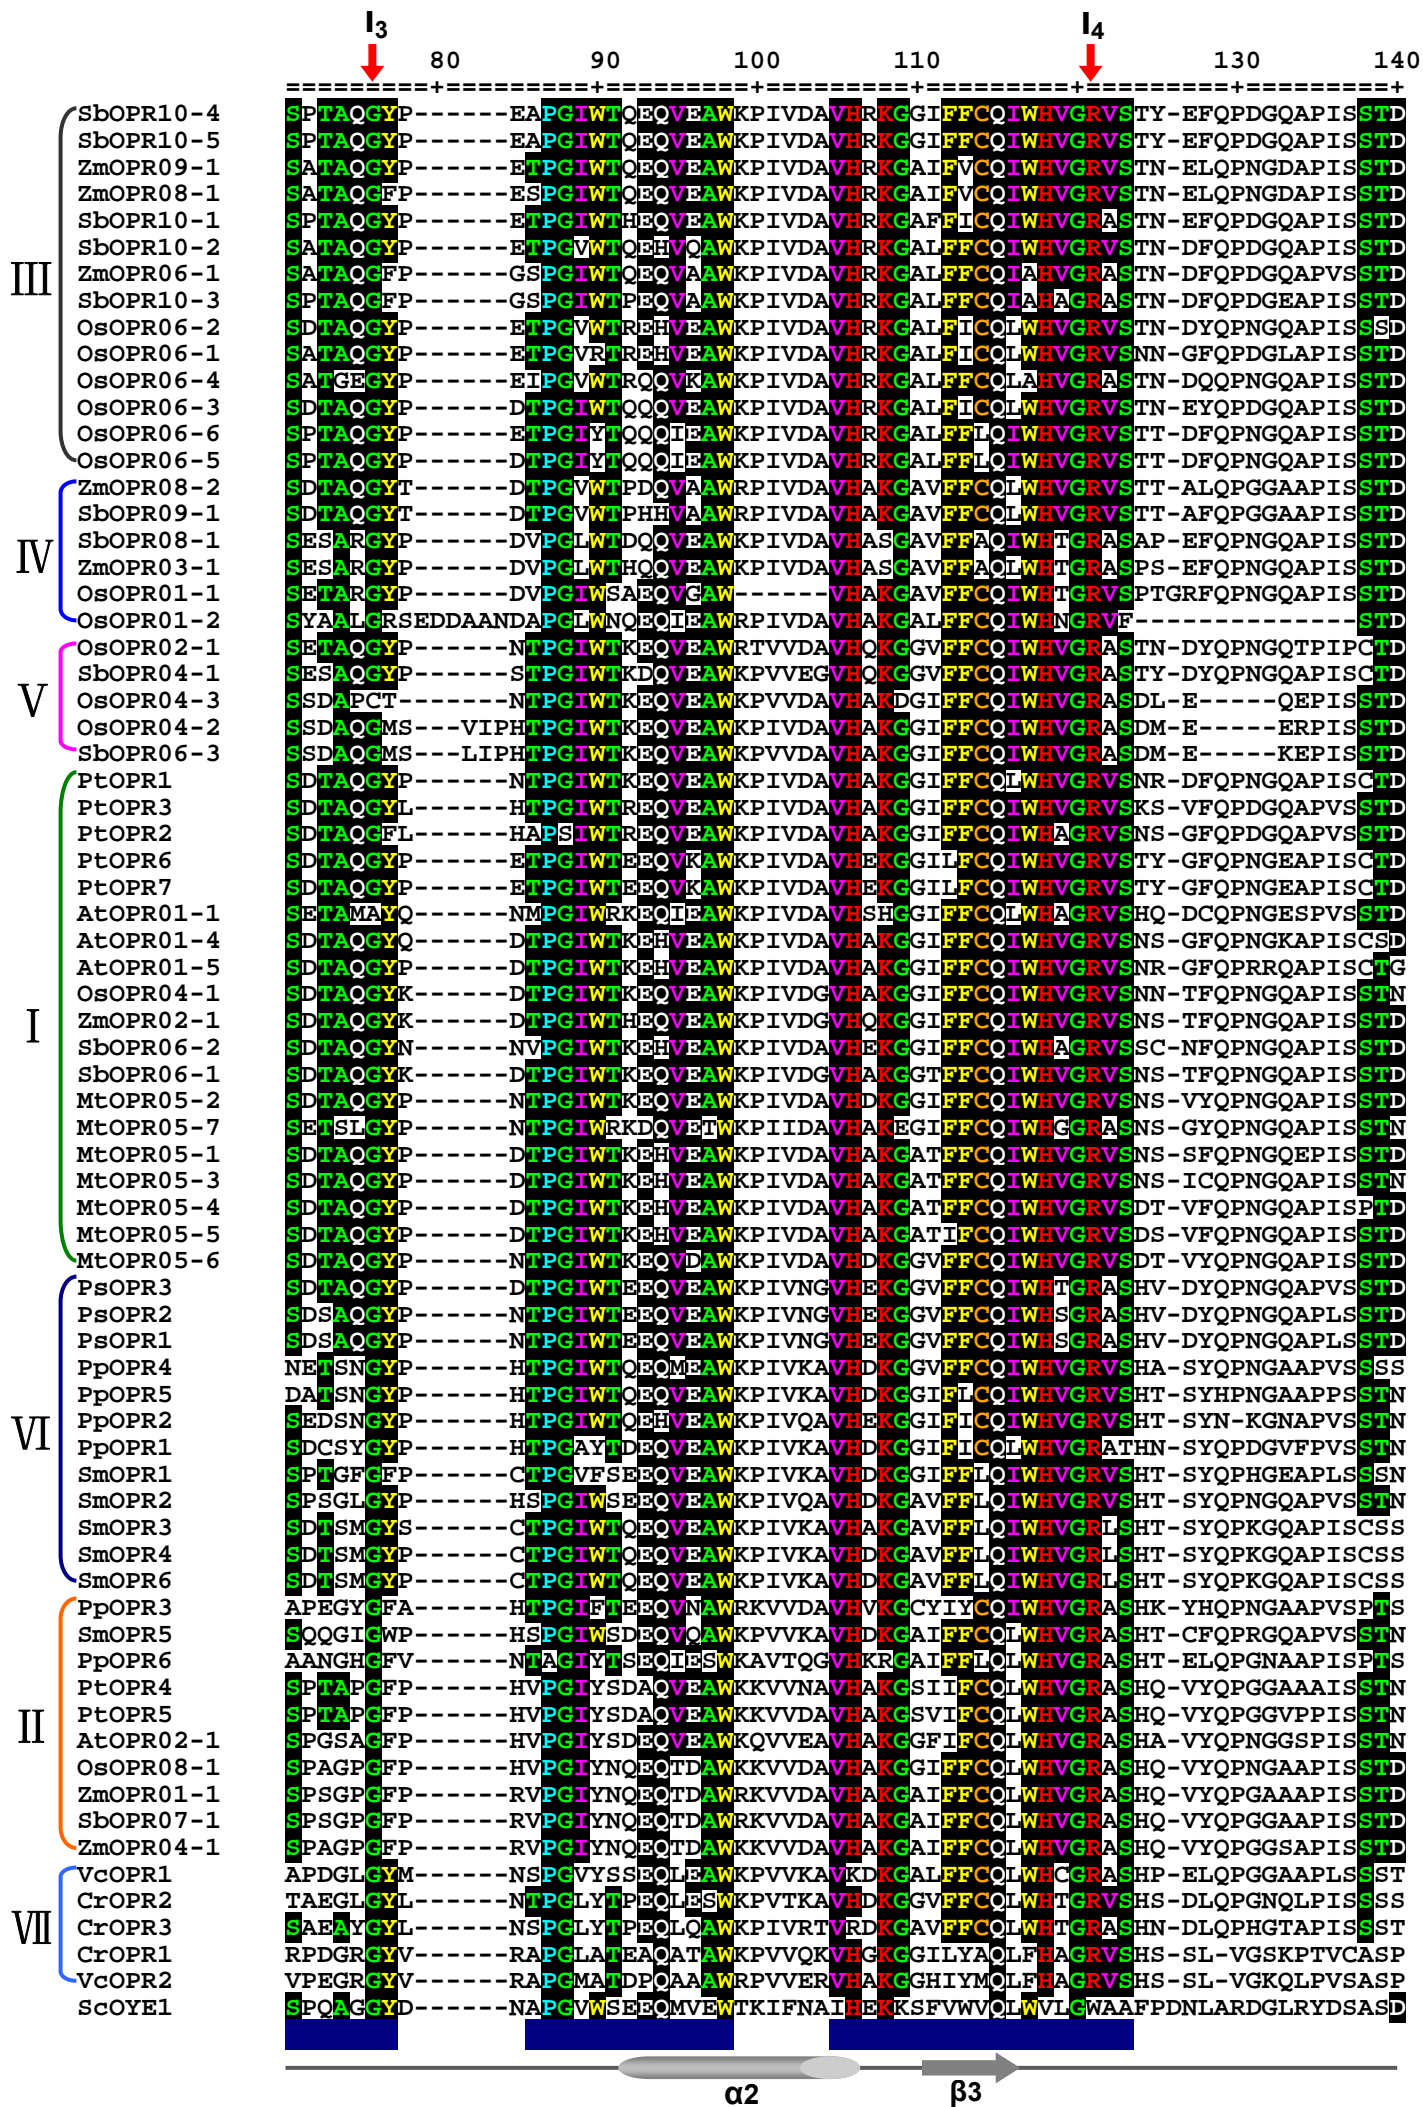

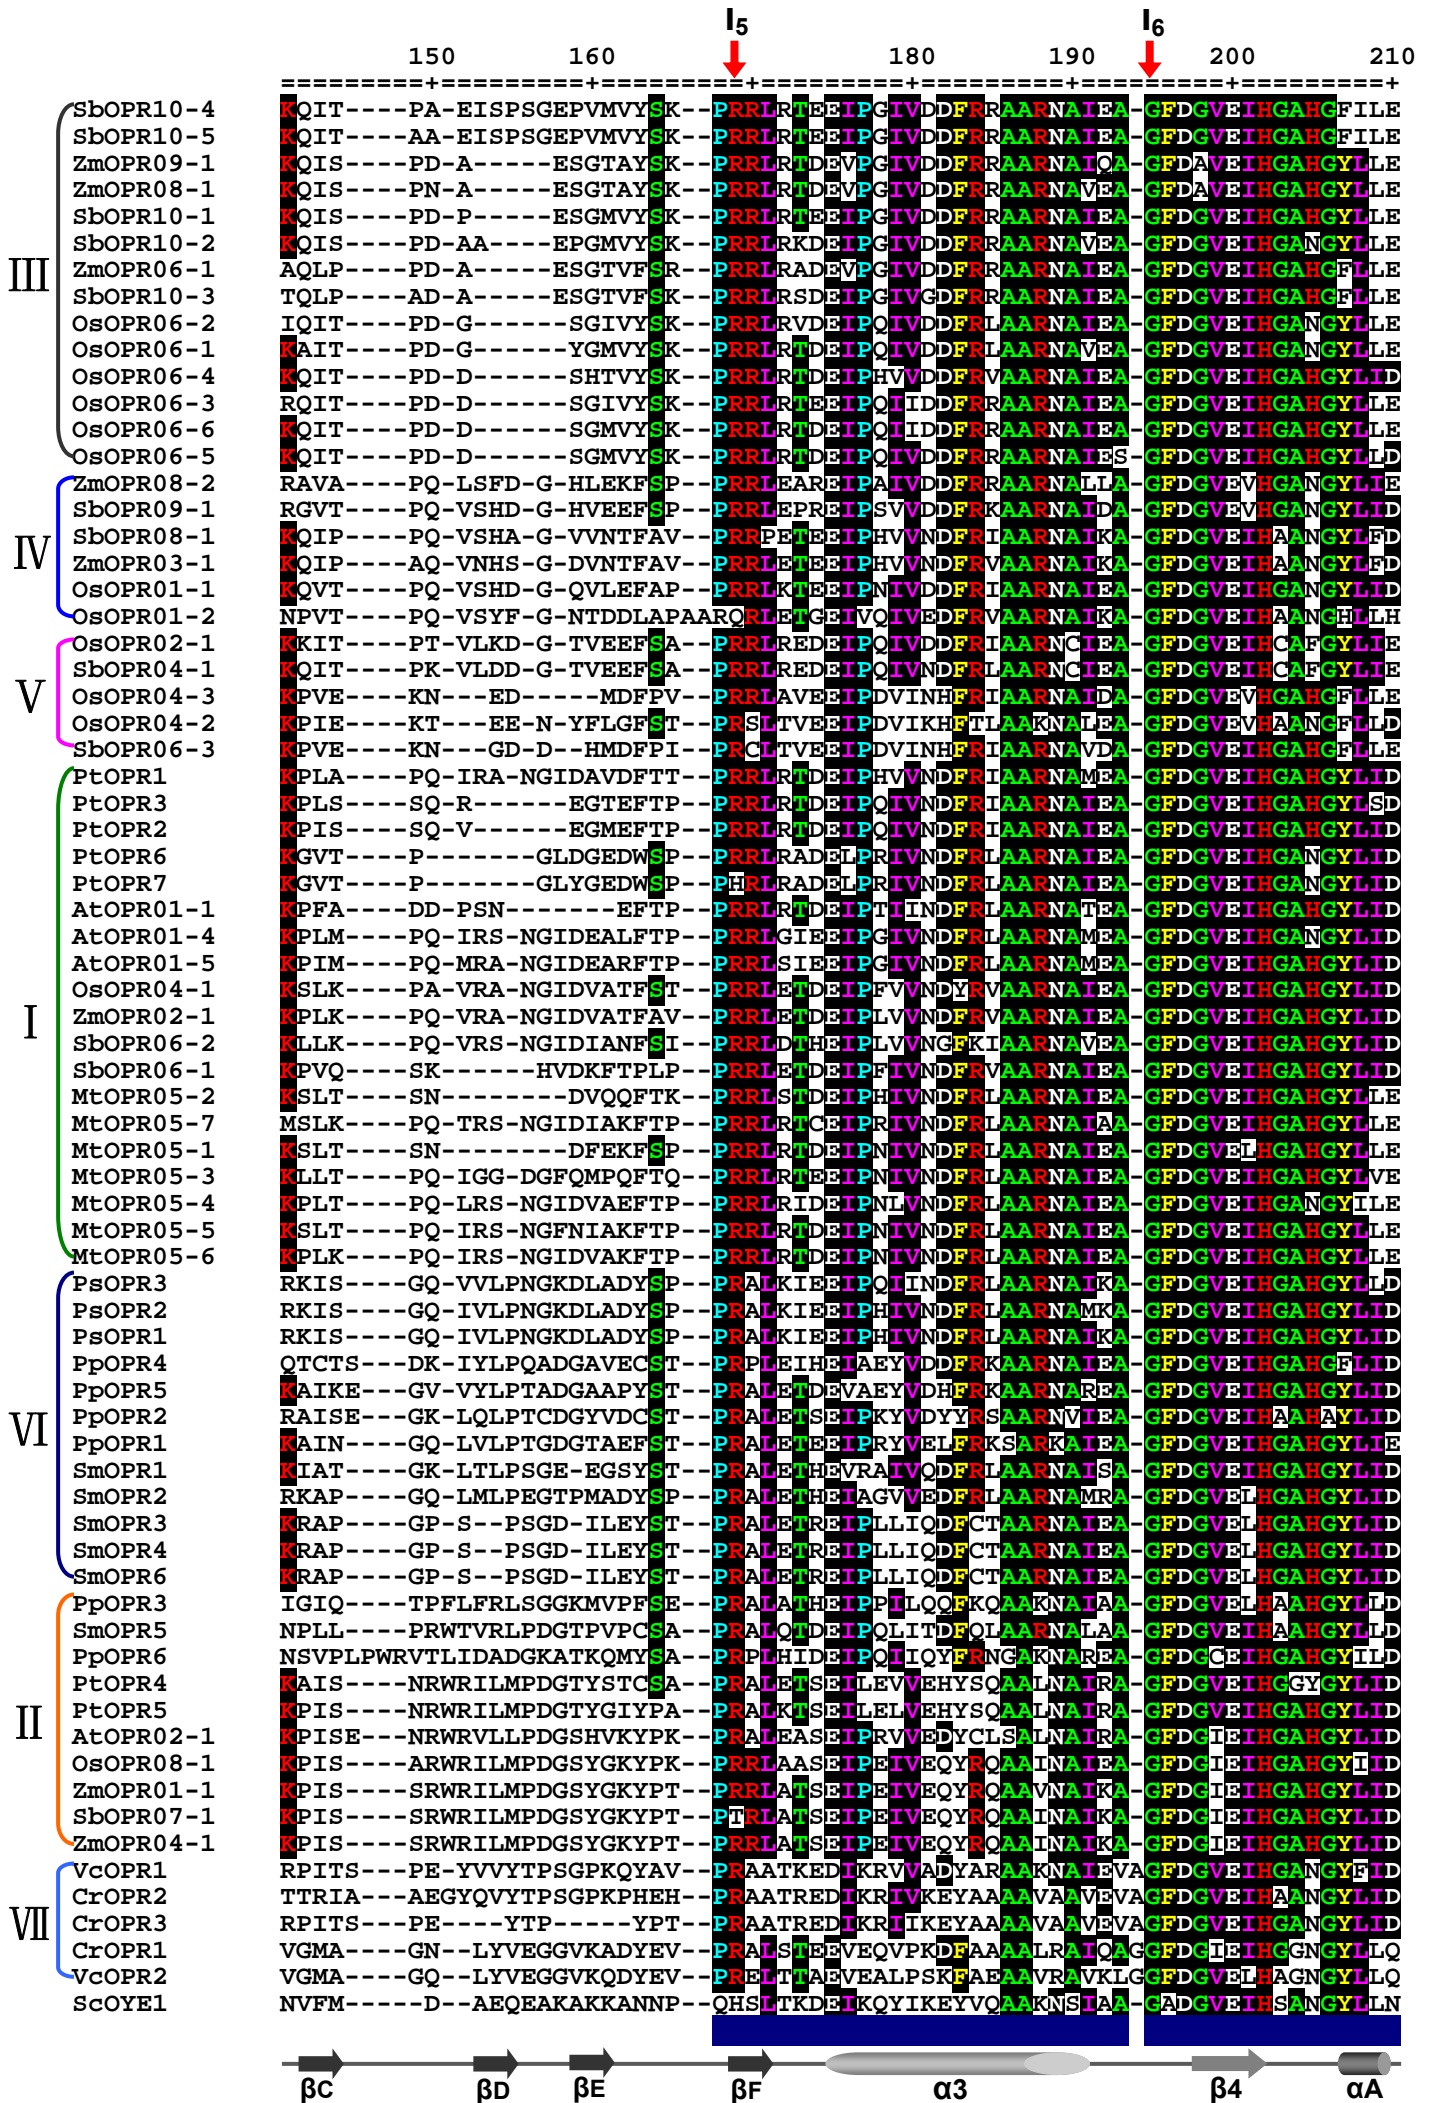



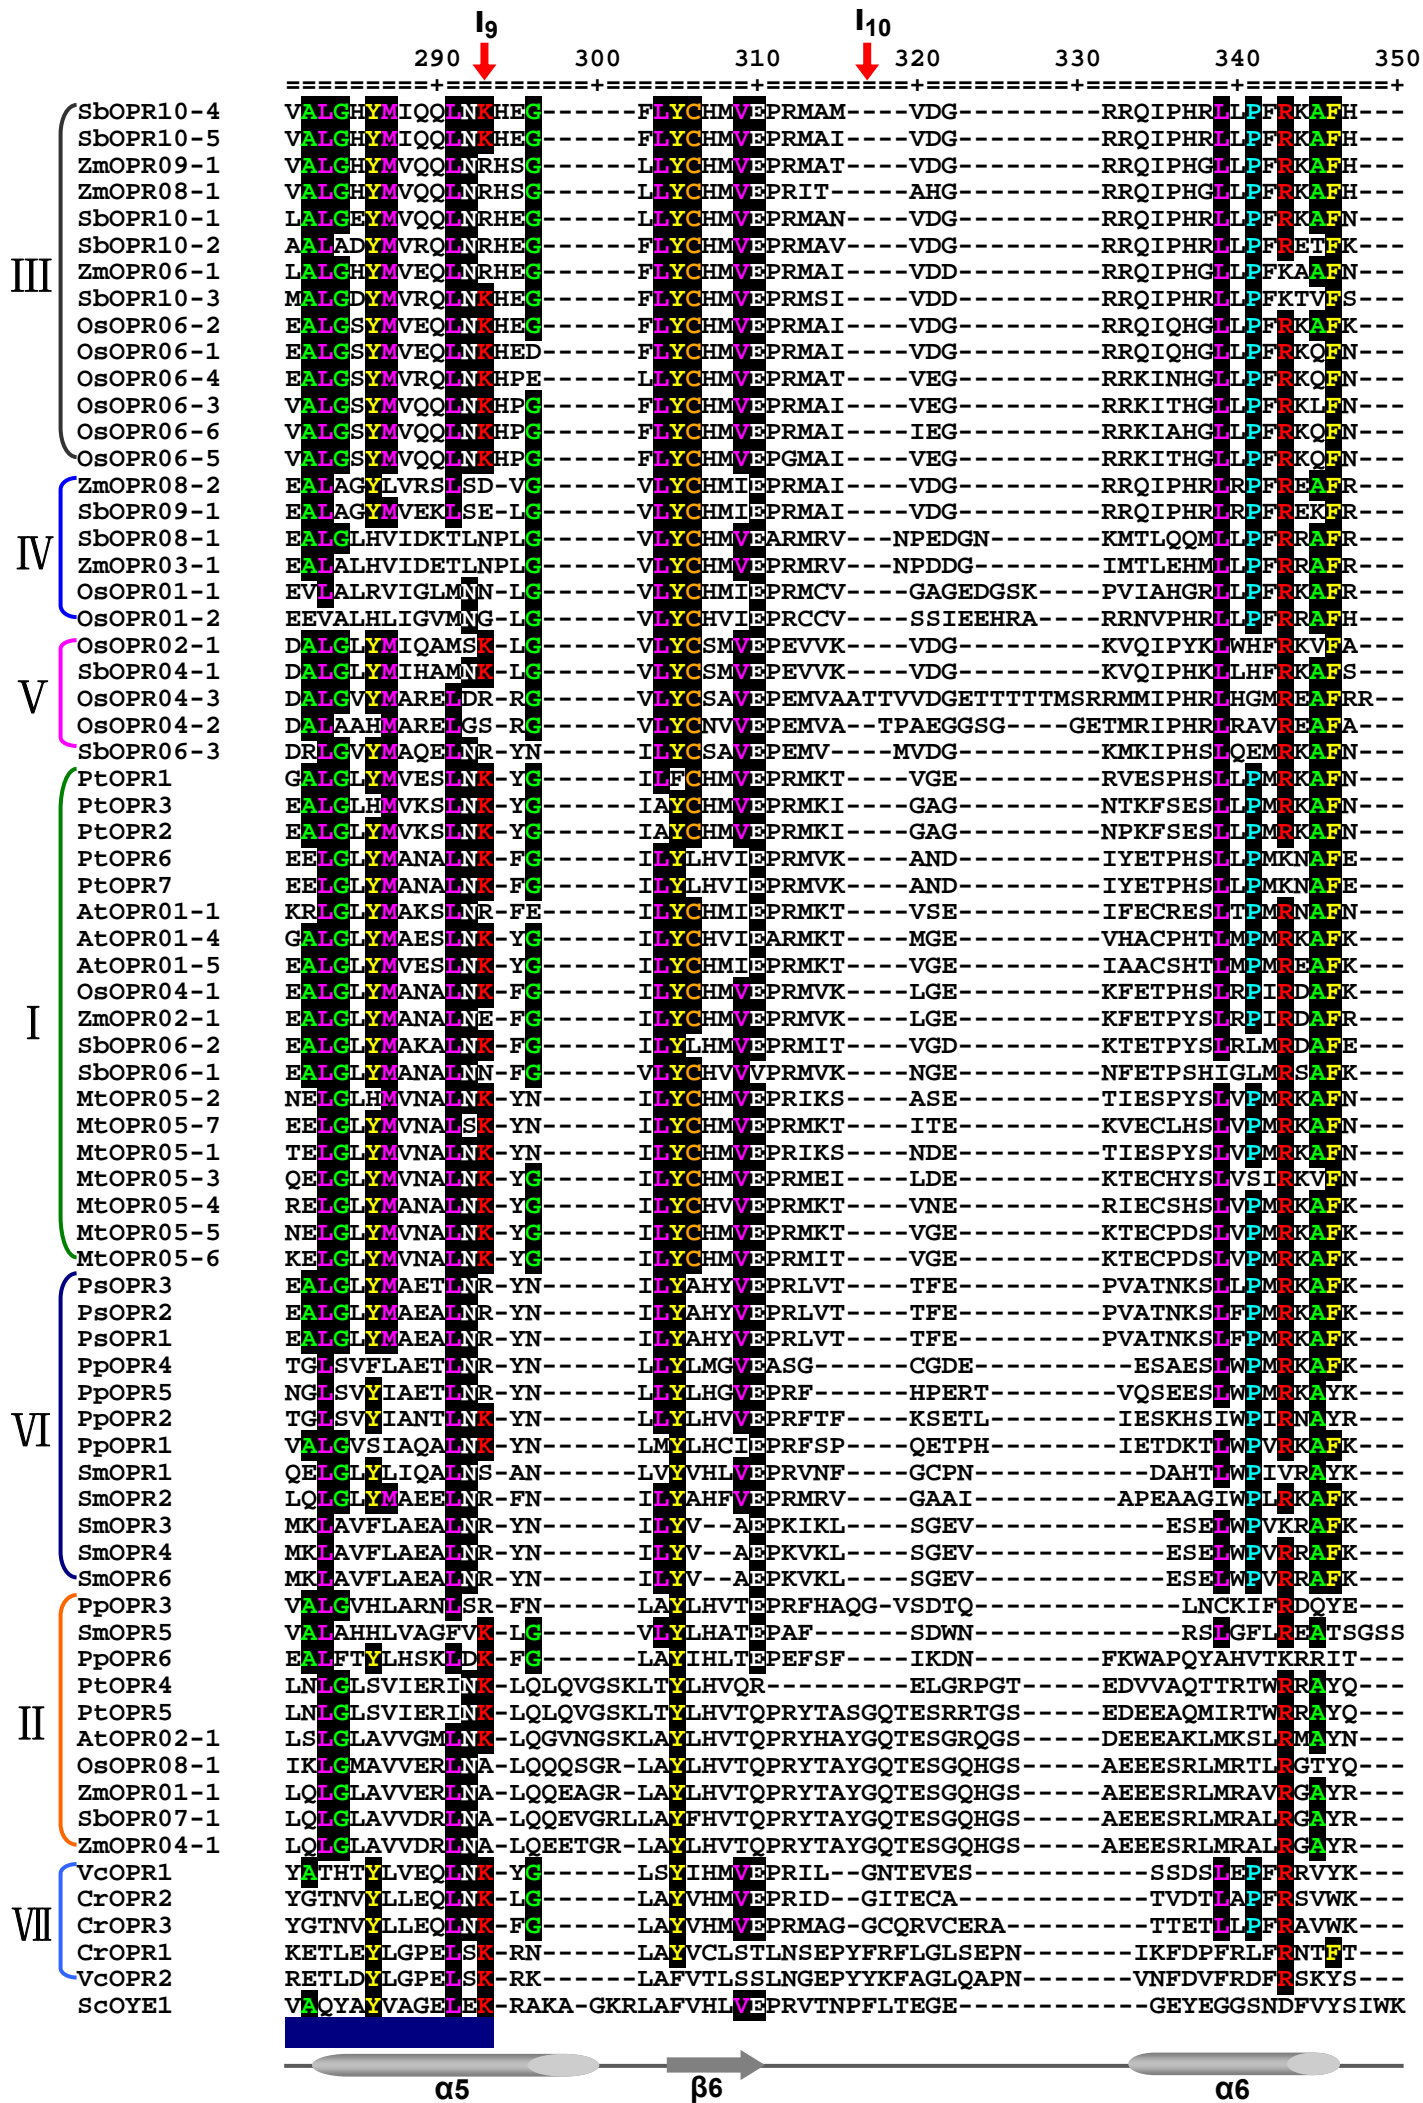



## Additional file 3

Amino acid sequences alignment of Oxidored\_FMN domain in OPR genes from eleven species representing six major lineages within the green plants: the green algae (*Chlamydomonas reinhardtii* and *Volvox carteri*), the mosses (*Physcomitrella patens*), the lycophytes (*Selaginella moellendorffii*), the gymnosperms (*Picea sitchensis*), the monocotyledoneous angiosperms (*Oryza sativa*, *Sorghum bicolor* and *Zea mays*) and the dicotyledoneous angiosperms (*Arabidopsis thaliana*, *Populus trichocarpa* and *Medicago truncatula*). Only 3 of 74 OPR genes (AtOPR01-2/3 and SbOPR06-4) without complete Oxidored\_FMN domain are excluded, while the outgroup ScOYE1 from yeast (Saito et al., 1991) is included in the alignment. The blue blocks below the alignment represent the fragments selected by the Gblocks program (Castresana, 2000; Talavera and Castresana, 2007) with default parameters underlined. Positions of the alignments where more than 50% of the sequences are identical are shown with black boxes. The secondary structure elements are represented at the bottom of the alignment as tubes or arrows shown in gray based on structural information from OPR proteins AtOPR1 (Fox et al., 2005), AtOPR3 (Malone et al., 2005) and LeOPR3 (Breithaupt et al., 2006). The intron positions of putative ancestral OPR are represented at the top of the alignment as red vertical arrows, and I<sub>1</sub>~I<sub>12</sub> represent intron 1~12. The seven conserved OPR subfamilies are represented as I, II, III, IV, V, VI and VII at the left side of the alignment.

## References

- Breithaupt C, Kurzbauer R, Lilie H, Schaller A, Strassner J, Huber R, Macheroux P, Clausen T (2006) Crystal structure of 12-oxophytodienoate reductase 3 from tomato: self-inhibition by dimerization. *Proc Natl Acad Sci U S A* 103: 14337-14342
- Castresana J (2000) Selection of conserved blocks from multiple alignments for their use in phylogenetic analysis. *Mol Biol Evol* 17: 540-552
- Fox BG, Malone TE, Johnson KA, Madson SE, Aceti D, Bingman CA, Blommel PG, Buchan B, Burns B, Cao J, Cornilescu C, Doreleijers J, Ellefson J, Frederick R, Geetha H, Hruby D, Jeon WB, Kimball T, Kunert J, Markley JL, Newman C, Olson A, Peterson FC, Phillips GN, Jr., Primm J, Ramirez B, Rosenberg NS, Runnels M, Seder K, Shaw J, Smith DW, Sreenath H, Song J, Sussman MR, Thao S, Troestler D, Tyler E, Tyler R, Ulrich E, Vinarov D, Vojtik F, Volkman BF, Wesenberg G, Wrobel RL, Zhang J, Zhao Q, Zolnai Z (2005) X-ray structure of Arabidopsis At1g77680, 12-oxophytodienoate reductase isoform 1. *Proteins* 61: 206-208
- Malone TE, Madson SE, Wrobel RL, Jeon WB, Rosenberg NS, Johnson KA, Bingman CA, Smith DW, Phillips GN, Jr., Markley JL, Fox BG (2005) X-ray structure of Arabidopsis At2g06050, 12-oxophytodienoate reductase isoform 3. *Proteins* 58: 243-245
- Saito K, Thiele DJ, Davio M, Lockridge O, Massey V (1991) The cloning and expression of a gene encoding Old Yellow Enzyme from *Saccharomyces carlsbergensis*. *J Biol Chem* 266: 20720-20724
- Talavera G, Castresana J (2007) Improvement of phylogenies after removing divergent and ambiguously aligned blocks from protein sequence alignments. *Syst Biol* 56: 564-577
