# Supplementary material for: Phylogenetic analysis, structural evolution and functional divergence of the 12-oxo-phytodienoate acid reductase gene family in plants
Source: PubMed Central journal article supplement (PMC2688005; doi:10.1186/1471-2148-9-90), 2009-05-05
Supplement: 1471-2148-9-90-S4.pdf [file 1471-2148-9-90-S4.pdf]

10 20 30 40 50 60 70

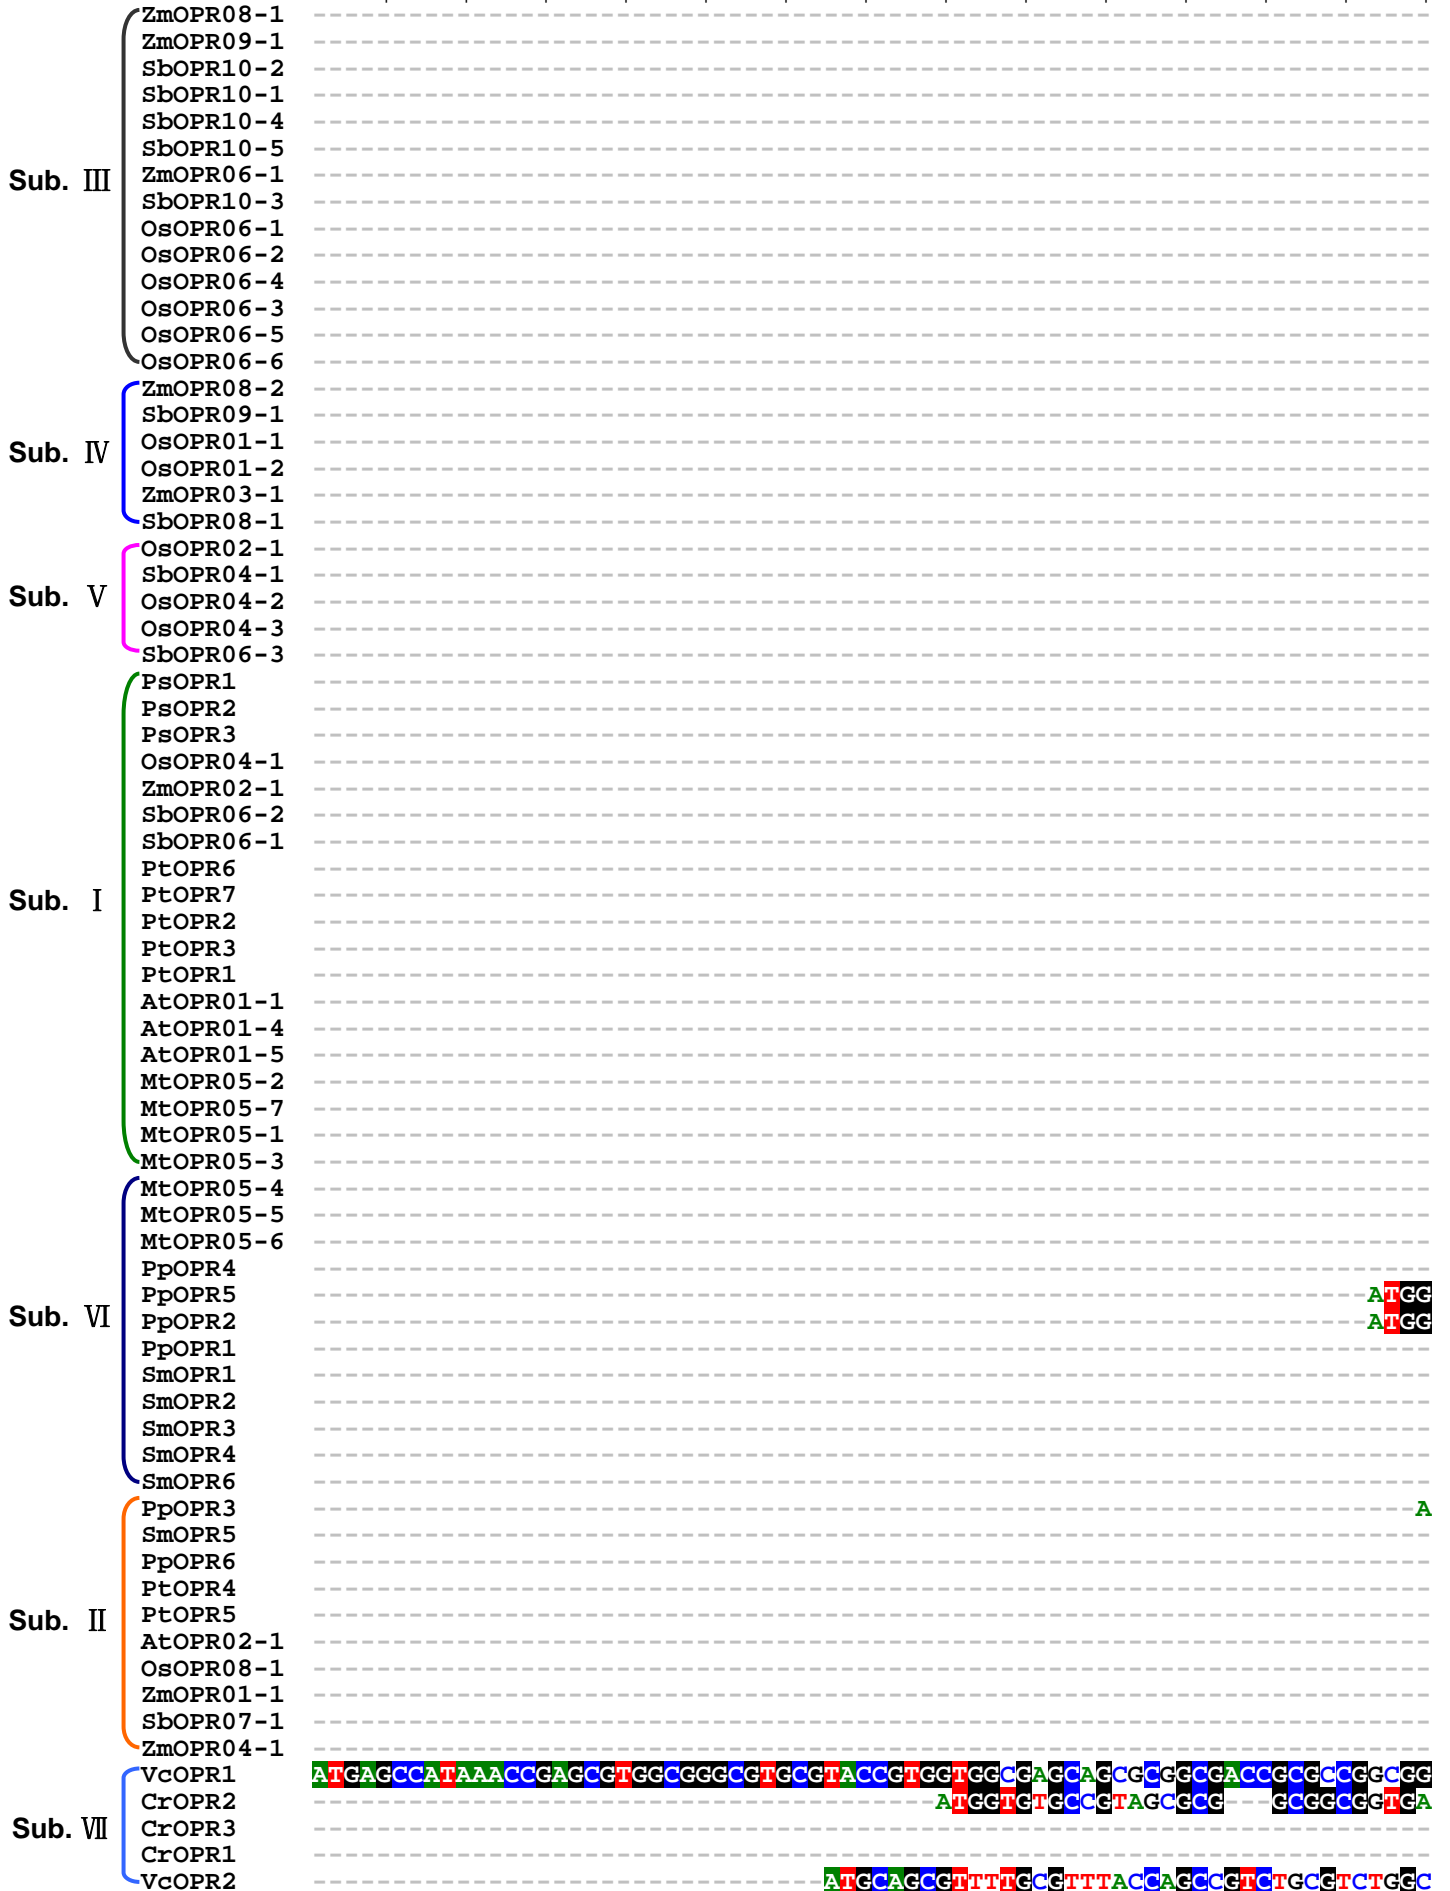

80 90 100 110 120 130 140

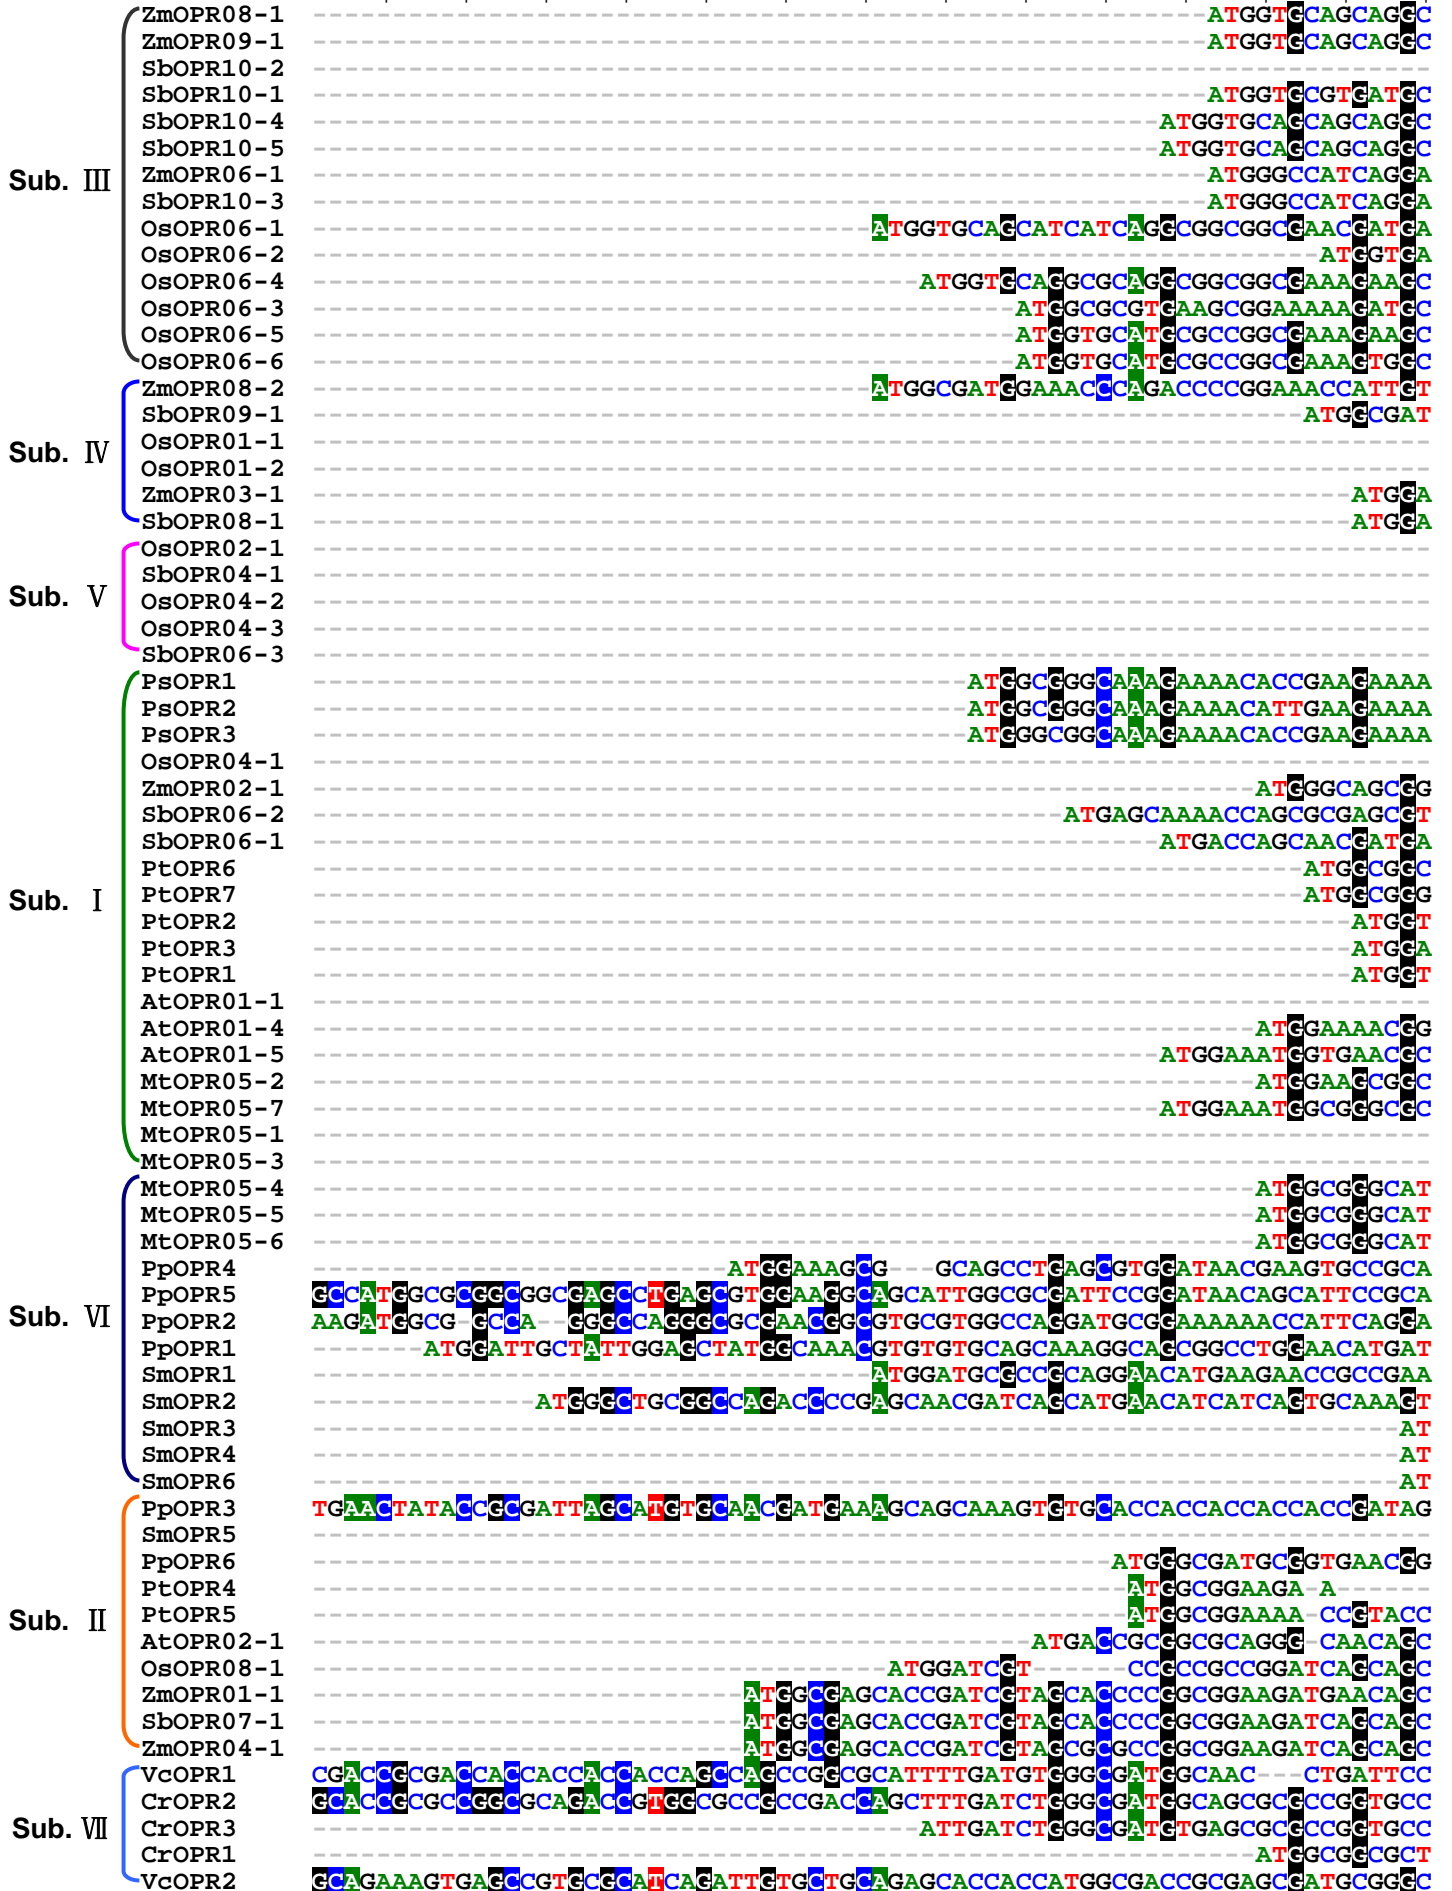

150 160 170 180 190 200 210

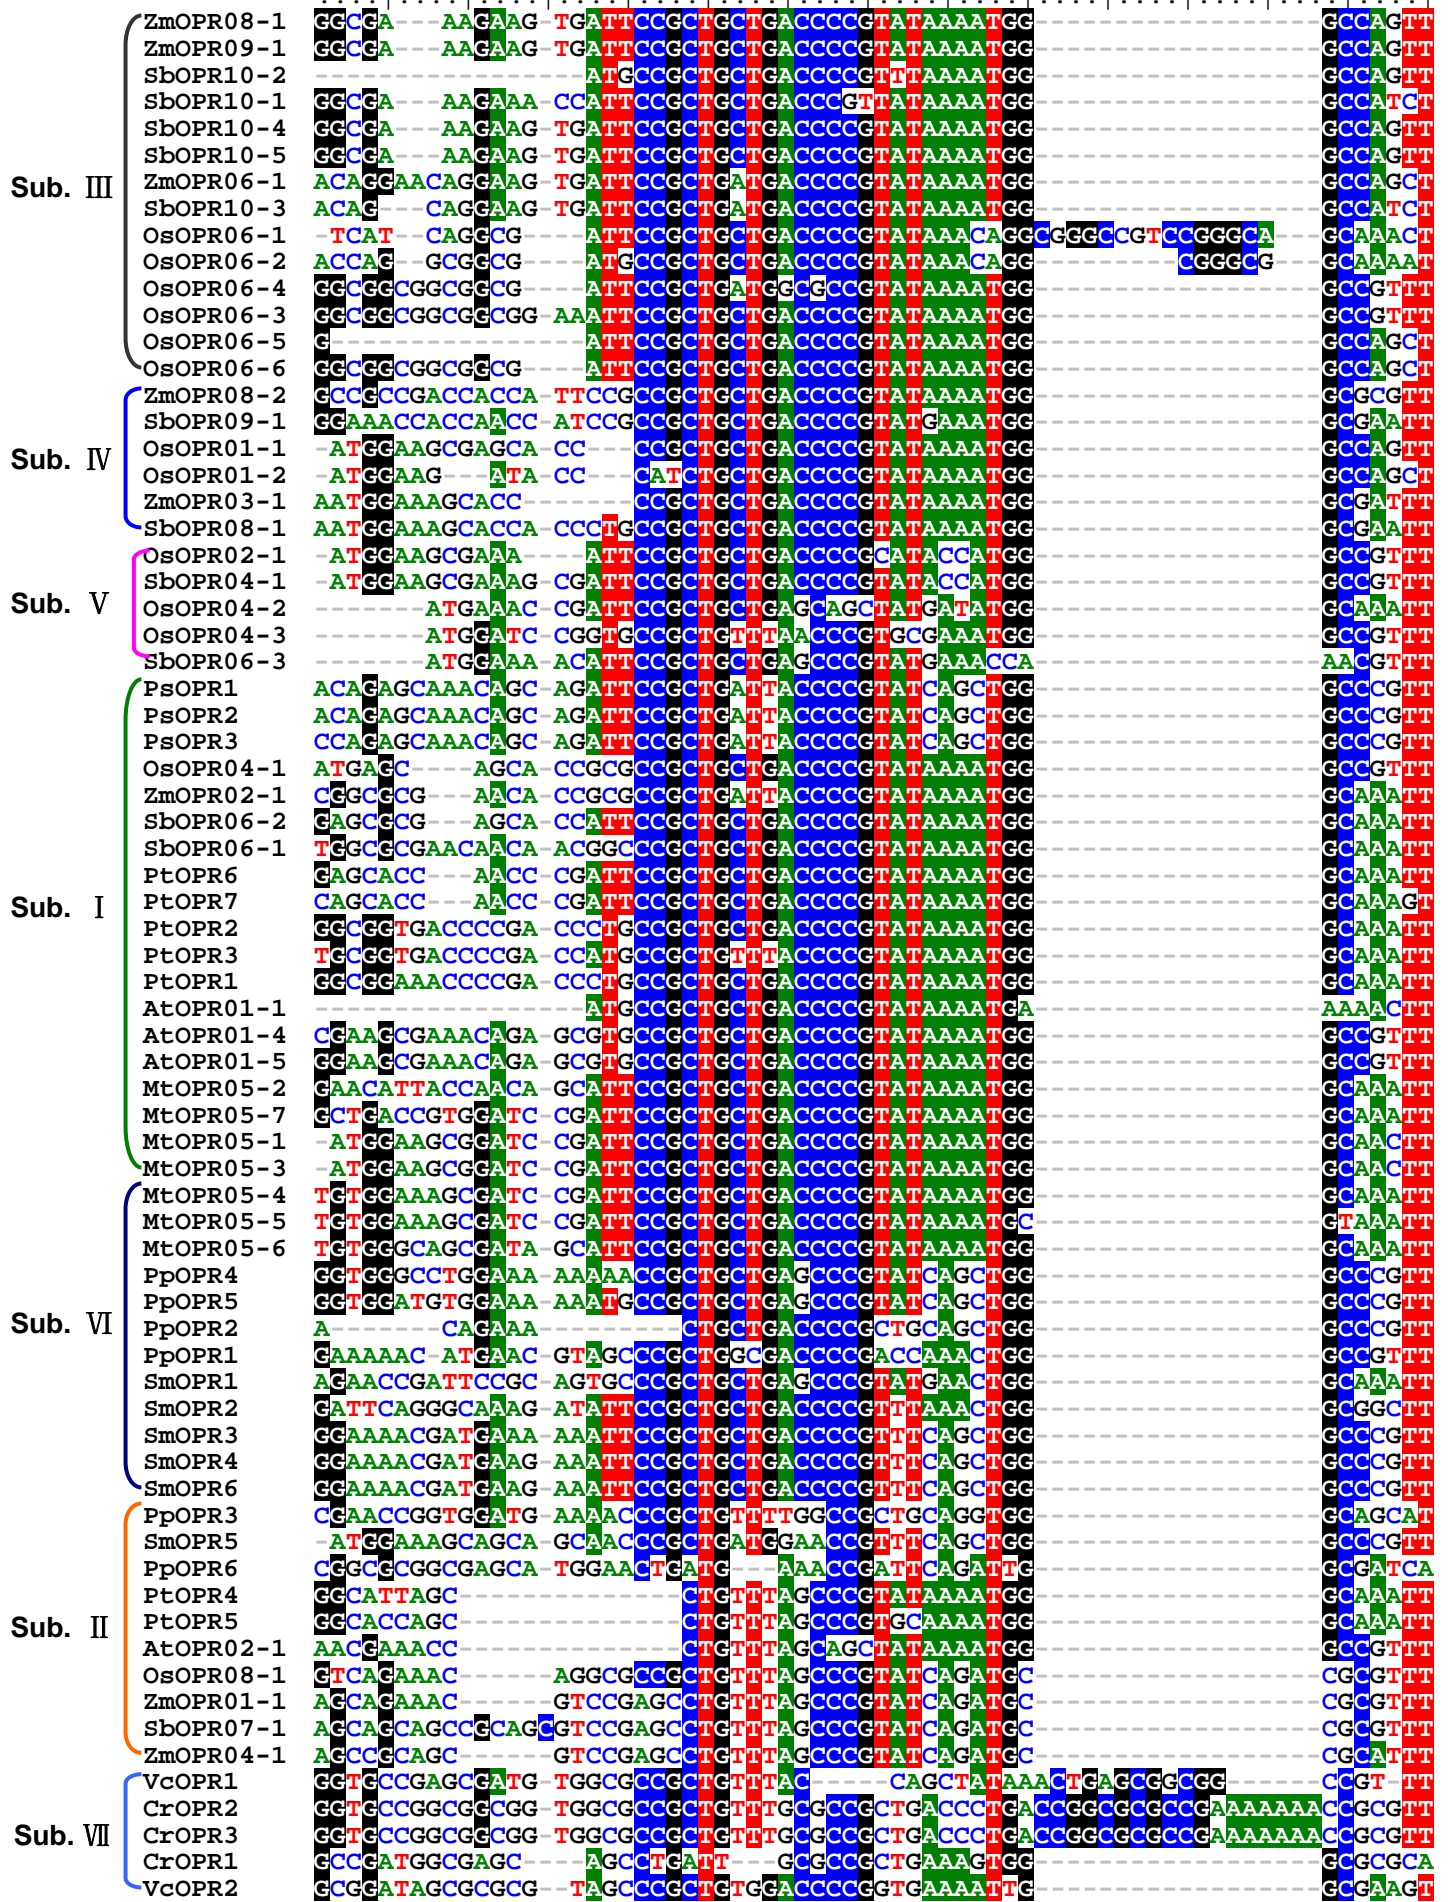



290 300 310 320 330 340 350

|          |           |                 |                                         |                                 |
|----------|-----------|-----------------|-----------------------------------------|---------------------------------|
| Sub. III | ZmOPR08-1 | CCG CAG CCG     | CAT GCG GCG GTG TATT ATAG CCAG CGT GCGA | CCG GTG GCG GCG CCG TGT GATT G  |
|          | ZmOPR09-1 | CCG CAG CCG     | CAT GCG GCG GTG TATT ATAG CCAG CGT GCGA | CCCGTGGCGGCGCTGCTGATTG          |
|          | SbOPR10-2 | CCG CAG CCG     | CAT GCG GCG GTG TATT ATAG CCAG CGT GCGA | CCCGTGGCGGCGCTGCTGATTG          |
|          | SbOPR10-1 | CCG CAG CCG     | CAT GCG GCG GTG TATT ATAG CCAG CGT GCGA | CCAGCGGCGGCGCTGCTGATTG          |
|          | SbOPR10-4 | CCG CAG CCG     | CAT GCG GCG GTG TATT ATAG CCAG CGT GCGA | CCAAAAGGCGGCGCTGCTGATTG         |
|          | SbOPR10-5 | CCG CAG CCG     | CAT GCG GCG GTG TATT ATAG CCAG CGT GCGA | CCAAAAGGCGGCGCTGCTGATTG         |
|          | ZmOPR06-1 | CCG CAG CCG     | CAT GCG GCG GTG TATT ATAG CCAG CGT GCGA | GCCGTGGCGGCGCTGCTGATTG          |
|          | SbOPR10-3 | CCG CAG CCG     | CAT GCG GCG GTG TATT ATAG CCAG CGT GCGA | CCCGTGGCGGCGCTGCTGATTG          |
|          | OsOPR06-1 | CCG CAG CCG     | CAT GCG GCG GTG TATT ATAG CCAG CGT GCGA | CCCGTGGCGGCGCTGCTGATTG          |
|          | OsOPR06-2 | CCG CAG CCG     | CAT GCG GCG GTG TATT ATAG CCAG CGT GCGA | CCAGCGGCGGCGCTGCTGATTG          |
|          | OsOPR06-4 | CCG CAG CCG     | CAT GCG GCG GTG TATT ATAG CCAG CGT GCGA | CCAACGGCGGCGCTGCTGATTG          |
|          | OsOPR06-3 | CCG CAG CCG     | CAT GCG GCG GTG TATT ATAG CCAG CGT GCGA | CCAGCGGCGGCGCTGCTGATTG          |
| Sub. IV  | ZmOPR08-2 | CCG CAG CCG     | CAT GCG GCG GTG TATT ATAG CCAG CGT GCGA | CCCGTGGCGGCGCTGCTGATTG          |
|          | SbOPR09-1 | CCG CAG CCG     | CAT GCG GCG GTG TATT ATAG CCAG CGT GCGA | CCCGTGGCGGCGCTGCTGATTG          |
|          | OsOPR01-1 | CCGGG CCG       | CATAACGGCGGTGATTATAGCCAGCGTGCGG         | CGCGTGGCGGCGCTGCTGATTG          |
|          | OsOPR01-2 | CCG CAG CCG     | CATAACCTGCTGTATTATAGCCAGCGTGCGA         | CCCCGGGCGGCGCTGCTGATTG          |
|          | ZmOPR03-1 | CCG CAG CCG GAA | CATATGGCGGTGATTATAGCCAGCGTGCGA          | CCCCGGGCGGCGCTGCTGATTG          |
| Sub. V   | SbOPR08-1 | CCG CAG CCG GAA | CATATGGCGGTGATTATAGCCAGCGTGCGA          | CCCCGGGCGGCGCTGCTGATTG          |
|          | OsOPR02-1 | CCG CAG GAA     | CATGTGCAGCTGTATTATAGCCAGCGTGCGA         | CCAACGGCGGCGCTGCTGATTG          |
|          | SbOPR04-1 | CCGGG CAG       | CATGTGGCGGTGATTATAGCCAGCGTGCGA          | GCGAAAGGCGGCGCTGCTGATTG         |
|          | OsOPR04-2 | CCG CAG GAA     | CATGCGATGGAAATATTATAGCCAGCGTGCGA        | CCAAAAGGCGGCGCTGCTGATTG         |
|          | SbOPR06-3 | CCG CAG GAA     | CATGCGATGGAAATATTATAGCCAGCGTGCGA        | CCAAAAGGCGGCGCTGCTGATTG         |
| Sub. I   | PtOPR6    | CCG CAG CCG     | CATGCGATTCTGTATTATAGCCAGCGTACCA         | GCCCGGGCGGCGCTGCTGATTG          |
|          | PtOPR7    | CCG CAG CCG     | CATGCGATTCTGTATTATAGCCAGCGTACCA         | GCCCGGGCGGCGCTGCTGATTG          |
|          | PtOPR2    | CCG CAG CCG     | CATGCGATTCTGTATTATAGCCAGCGTACCA         | CCAAAAGGCGGCGCTGCTGATTG         |
|          | PtOPR3    | CCG CAG CCG     | CATGCGATTCTGTATTATAGCCAGCGTACCA         | CCAAAAGGCGGCGCTGCTGATTG         |
|          | PtOPR1    | CCG CAG CCG     | CATGCGATTCTGTATTATAGCCAGCGTACCA         | CCGAAAGGCGGCGCTGCTGATTG         |
|          | AtOPR01-1 | CCG CAG CCG     | CATGTGGCGCTGTATTATAGCCAGCGTACCA         | CCCCGGGCGGCGCTGCTGATTG          |
|          | AtOPR01-4 | CCG CAG CCG     | CATGCGGCGATTATATTATAGCCAGCGTACCA        | CCCCGGGCGGCGCTGCTGATTG          |
|          | AtOPR01-5 | CCG CAG CCG     | CATGCGATTCTGTATTATAGCCAGCGTACCA         | GCCCGGGCGGCGCTGCTGATTG          |
|          | MtOPR05-2 | CCG CAG CCG     | ATTGCGGTGAAATATTATAGCCAGCGTACCA         | GAAAAGGCGGCGCTGCTGATTG          |
|          | MtOPR05-7 | CCG CAG CCG     | CATAACACCCTGTATTATAGCCAGCGTACCA         | GCCAGGGCGGCGCTGCTGATTG          |
|          | MtOPR05-1 | CCG CAG CCG     | CATGCGGTGCTGTATTATAGCCAGCGTGCGA         | GAAAAGGCGGCGCTGCTGATTG          |
|          | MtOPR05-3 | CCG CAG CCG     | CATGCGGTGCTGTATTATAGCCAGCGTGCGA         | GAAAAGGCGGCGCTGCTGATTG          |
| Sub. VI  | MtOPR05-4 | CCG CAG CCG     | CATGCGATTCTGTATTATAGCCAGCGTGCGG         | CCGGCAGAAAGGCGGCGCTGCTGATTG     |
|          | MtOPR05-5 | CCG CAG CCG     | CATGCGATTCTGTATTATAGCCAGCGTGCGA         | CCGGCAGAAAGGCGGCGCTGCTGATTG     |
|          | MtOPR05-6 | CCG CAG CCG     | CATGCGATTCTGTATTATAGCCAGCGTGCGA         | CCAAAAGGCGGCGCTGCTGATTG         |
|          | PpOPR4    | CCG CAG CCG     | CATGCGGCGCTGTATTATAGCCAGCGTACCA         | CCCGTGGCGGCGCTGCTGATTG          |
|          | PpOPR5    | CCG CAG CCG     | CATGCGGCGCTGTATTATAGCCAGCGTACCA         | CCCGGGCGGCGCTGCTGATTG           |
|          | PpOPR2    | CCG CAG CCG     | CATGCGGCGCTGTATTATAGCCAGCGTACCA         | GCCCGGGCGGCGCTGCTGATTG          |
|          | PpOPR1    | CCG CAG CCG     | CATGCGGCGCTGTATTATAGCCAGCGTACCA         | CCCATGGCGGCGCTGCTGATTG          |
|          | SmOPR1    | CCG CAG CCG     | CATGCGGCGACTTATTATAGCCAGCGTGCGA         | CCCAGGGCGGCGCTGCTGATTG          |
|          | SmOPR2    | CCG CAG CCG     | CATGCGGCGATTATTATTATAGCCAGCGTGCGA       | CCCAGGGCGGCGCTGCTGATTG          |
|          | SmOPR3    | CCG CAG CCG     | CATGCGGCGGTGTATTATAGCCAGCGTGCGA         | CCCCGGGCGGCGCTGCTGATTG          |
|          | SmOPR4    | CCG CAG CCG     | CATGCGGCGGTGTATTATAGCCAGCGTGCGA         | CCCCGGGCGGCGCTGCTGATTG          |
|          | SmOPR6    | CCG CAG CCG     | CATGCGGCGGTGTATTATAGCCAGCGTGCGA         | CCCCGGGCGGCGCTGCTGATTG          |
| Sub. II  | PpOPR3    | CCG CAG GAT     | CGCATG TGGAAACATTATATG CAGCGTGCGA       | CCCCGGGCGGCGCTGCTGATTG          |
|          | SmOPR5    | CCG CAG CCG     | CGAAC TGTGTATTATAGCCAGCGTGCGA           | GCCCGGGCGGCGCTGCTGATTG          |
|          | PpOPR6    | GCG ACCCG       | CTGATGACCGAATATTATG CAGCGTGCGA          | CCGAAAGGCGGCGCTGCTGATTG         |
|          | PtOPR4    | CCGGG CAG       | CGC TGGTGGAAATATTATAGCCAGCGTAGCA        | CCCCGGGCGGCGCTGCTGATTG          |
|          | PtOPR5    | CCGGG CAG       | CGC TGGCGGAATATTATAGCCAGCGTAGCA         | CCCCGGGCGGCGCTGCTGATTG          |
|          | AtOPR02-1 | CCG AAC CCG     | CGC TGGCGGAATATTATAGCCAGCGTAGCA         | CCCCGGGCGGCGCTGCTGATTG          |
|          | OsOPR08-1 | CCGGG CCG       | CGC TGGCGGAATATTATAGCCAGCGTAGCA         | CCCAGGGCGGCGCTGCTGATTG          |
|          | ZmOPR01-1 | CCGGG CCG       | CGC TGGCGGAATATTATAGCCAGCGTAGCA         | CCGATGGCGGCGCTGCTGATTG          |
|          | SbOPR07-1 | CCGGG CCG       | CGC TGGCGGAATATTATAGCCAGCGTAGCA         | CCGAAAGGCGGCGCTGCTGATTG         |
|          | ZmOPR04-1 | CCGGG CCG       | CGC TGGCGGAATATTATAGCCAGCGTAGCA         | CCGAAAGGCGGCGCTGCTGATTG         |
|          | VcOPR1    | CCG CAG CCG     | AGCGCGGCGGTGTATTATAGCCAGCGTGCGG         | TGCCGGGACCGCTGCTGATTG           |
|          | Sub. VII  | CrOPR2          | CAG CCG CCG                             | CAGGCGGCGGAATATTATAGCCAGCGTAGCG |
| CrOPR3   |           | CCG CAG CCG     | AGCGCGGCGACTTATTATAGCCAGCGTGCGG         | TGCCGGGACCGCTGCTGATTG           |
| CrOPR1   |           | TGCCG AACGAT    | CTGCTGGCGCAGTATTATAGCCAGCGTGCGA         | GAAAAGGCGGCGCTGCTGATTG          |
| VcOPR2   |           | CTGCC AACGAT    | CTGCTGGCGCAGTATTATAGCCAGCGTGCGA         | GAAAAGGCGGCGCTGCTGATTG          |



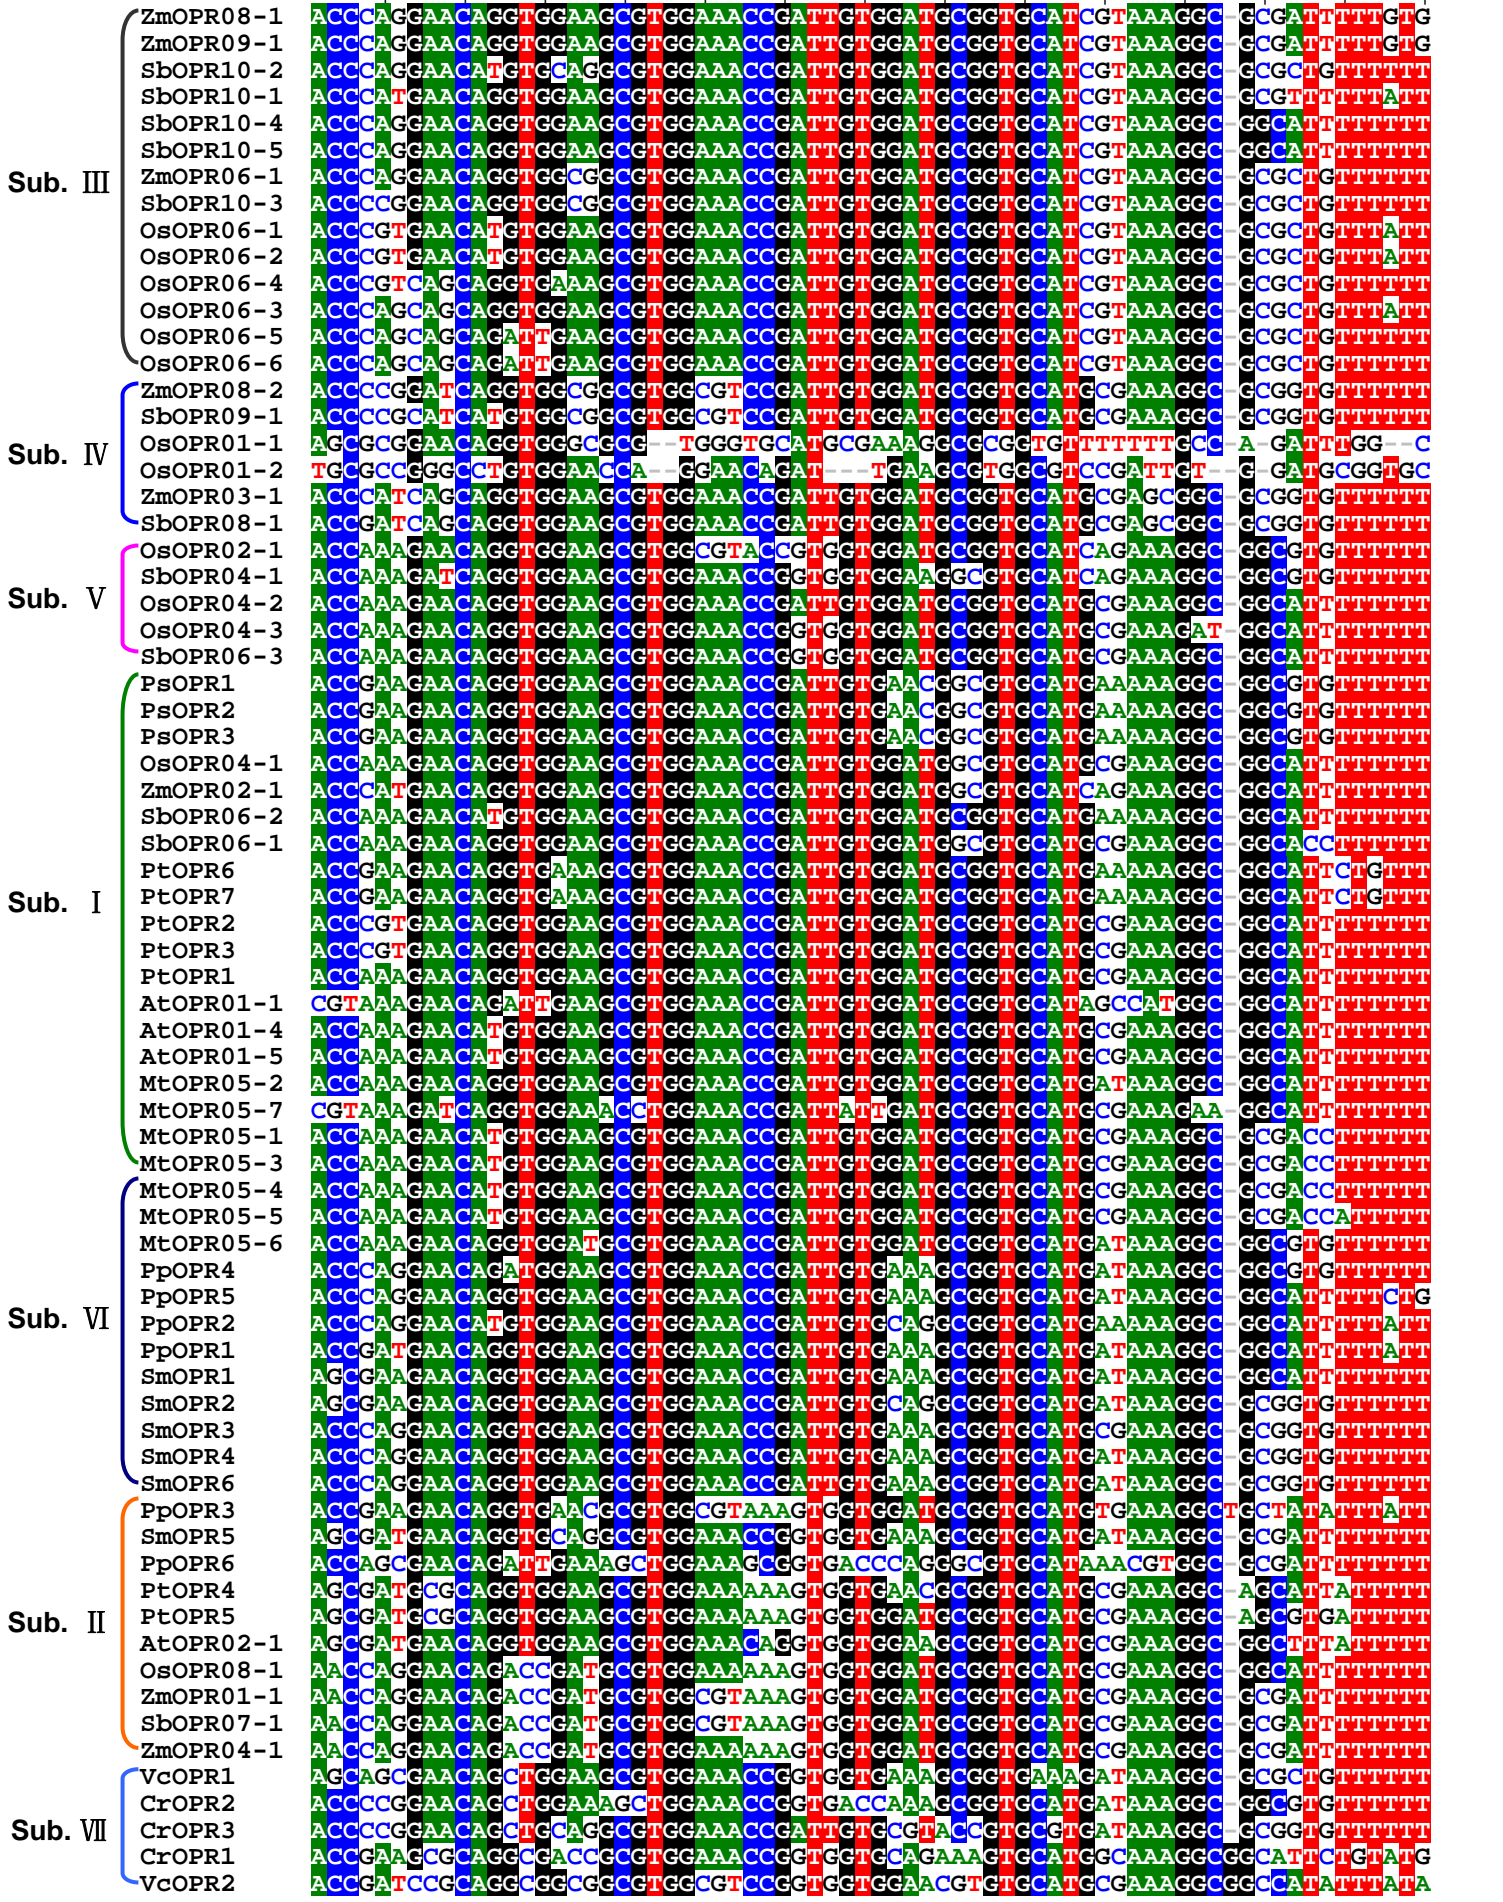

500 510 520 530 540 550 560

|          |                                                                       |                                                                        |
|----------|-----------------------------------------------------------------------|------------------------------------------------------------------------|
| Sub. III | ZmOPR8-1                                                              | TGCCAGATTTGGCATGTGGGCGTGTGAGCACCAACGAACCTGCAGCCGAACGGCGATGCGCCGATTAGC  |
|          | ZmOPR9-1                                                              | TGCCAGATTTGGCATGTGGGCGTGTGAGCACCAACGAACCTGCAGCCGAACGGCGATGCGCCGATTAGC  |
|          | SbOPR10-2                                                             | TGCCAGATTTGGCATGTGGGCGTGTGAGCACCAACGATTTTTCAGCCGGATGGCCAGGCGCCGATTAGC  |
|          | SbOPR10-1                                                             | TGCCAGATTTGGCATGTGGGCGTGTGAGCACCAACGAATTTTCAGCCGGATGGCCAGGCGCCGATTAGC  |
|          | SbOPR10-4                                                             | TGCCAGATTTGGCATGTGGGCGTGTGAGCACCTATGAATTTTCAGCCGGATGGCCAGGCGCCGATTAGC  |
|          | SbOPR10-5                                                             | TGCCAGATTTGGCATGTGGGCGTGTGAGCACCTATGAATTTTCAGCCGGATGGCCAGGCGCCGATTAGC  |
|          | ZmOPR6-1                                                              | TGCCAGATTTGGCATGTGGGCGTGTGAGCACCAACGATTTTTCAGCCGGATGGCCAGGCGCCGATTAGC  |
|          | SbOPR10-3                                                             | TGCCAGATTTGGCATGTGGGCGTGTGAGCACCAACGATTTTTCAGCCGGATGGCCAGGCGCCGATTAGC  |
|          | OsOPR6-1                                                              | TGCCAGCTGTGGCATGTGGGCGTGTGAGCAACAAACGGCTTTTCAGCCGGATGGCCAGGCGCCGATTAGC |
|          | OsOPR6-2                                                              | TGCCAGCTGTGGCATGTGGGCGTGTGAGCAACAAACGATTTTCAGCCGGATGGCCAGGCGCCGATTAGC  |
|          | OsOPR6-4                                                              | TGCCAGCTGTGGCATGTGGGCGTGTGAGCAACAAACGATTTTCAGCCGGATGGCCAGGCGCCGATTAGC  |
|          | OsOPR6-3                                                              | TGCCAGCTGTGGCATGTGGGCGTGTGAGCAACAAACGATTTTCAGCCGGATGGCCAGGCGCCGATTAGC  |
| OsOPR6-5 | CTGCAGATTTGGCATGTGGGCGTGTGAGCACCAACGATTTTTCAGCCGAACGGCCAGGCGCCGATTAGC |                                                                        |
| OsOPR6-6 | CTGCAGATTTGGCATGTGGGCGTGTGAGCACCAACGATTTTTCAGCCGAACGGCCAGGCGCCGATTAGC |                                                                        |
| Sub. IV  | ZmOPR8-2                                                              | TGCCAGCTGTGGCATGTGGGCGTGTGAGCACCAACCGCGCTGCAGCCGGGCGGCGGGCGCCGATTAGC   |
|          | SbOPR9-1                                                              | TGCCAGCTGTGGCATGTGGGCGTGTGAGCACCAACCGCGTTTCAGCCGGGCGGCGGGCGCCGATTAGC   |
|          | OsOPR01-1                                                             | ATACCAGCCTGTGTGAGCCGCGGCTGCAGCAACCGCTTTTCAGCCGAACGGCCAGGCGCCGATTAGC    |
|          | OsOPR01-2                                                             | ATCCGAAAAGGCGCGCTGTGTTTTCAGCAATTTTCAGCAATTAACGGCGTGTGTTT               |
| Sub. V   | ZmOPR3-1                                                              | GCGCAGCTGTGGCATACCGGCGTGTGAGCCGAGCGAATTTTCAGCCGAACGGCCAGGCGCCGATTAGC   |
|          | SbOPR8-1                                                              | GCGCAGATTTGGCATACCGGCGTGTGAGCCGCGGAAATTTTCAGCCGAACGGCCAGGCGCCGATTAGC   |
|          | OsOPR02-1                                                             | TGCCAGATTTGGCATGTGGGCGTGTGAGCACCAACGATTTTCAGCCGAACGGCCAGGCGCCGATTCCG   |
|          | SbOPR4-1                                                              | TGCCAGATTTGGCATGTGGGCGTGTGAGCACCTATGATTTTCAGCCGAACGGCCAGGCGCCGATTAGC   |
| Sub. VI  | OsOPR4-2                                                              | TGCCAGATTTGGCATGTGGGCGTGTGAGCCGAGCGATATGGAAGAACTCCGATTAGC              |
|          | OsOPR4-3                                                              | TGCCAGATTTGGCATGTGGGCGTGTGAGCCGAGCGATCTGGAACAGGAAACCGATTAGC            |
|          | SbOPR6-3                                                              | TGCCAGATTTGGCATGTGGGCGTGTGAGCCGAGCGATATGGAAGAAACCGATTAGC               |
|          | PtOPR1                                                                | TGCCAGATTTGGCATAGCGGCGTGTGAGCCATGTGGATTATCAGCCGAACGGCCAGGCGCCGCTGAGC   |
| Sub. I   | PtOPR2                                                                | TGCCAGATTTGGCATAGCGGCGTGTGAGCCATGTGGATTATCAGCCGAACGGCCAGGCGCCGCTGAGC   |
|          | PtOPR3                                                                | TGCCAGATTTGGCATAGCGGCGTGTGAGCCATGTGGATTATCAGCCGAACGGCCAGGCGCCGCTGAGC   |
|          | OsOPR4-1                                                              | TGCCAGATTTGGCATGTGGGCGTGTGAGCAACAGCACCTTTTCAGCCGAACGGCCAGGCGCCGATTAGC  |
|          | ZmOPR2-1                                                              | TGCCAGATTTGGCATGTGGGCGTGTGAGCAACAGCACCTTTTCAGCCGAACGGCCAGGCGCCGATTAGC  |
|          | SbOPR6-2                                                              | TGCCAGATTTGGCATGTGGGCGTGTGAGCAACAGCACCTTTTCAGCCGAACGGCCAGGCGCCGATTAGC  |
|          | SbOPR6-1                                                              | TGCCAGATTTGGCATGTGGGCGTGTGAGCAACAGCACCTTTTCAGCCGAACGGCCAGGCGCCGATTAGC  |
|          | PtOPR6                                                                | TGCCAGATTTGGCATGTGGGCGTGTGAGCACCTATGGCTTTTCAGCCGAACGGCCAGGCGCCGATTAGC  |
|          | PtOPR7                                                                | TGCCAGATTTGGCATGTGGGCGTGTGAGCACCTATGGCTTTTCAGCCGAACGGCCAGGCGCCGATTAGC  |
|          | PtOPR2                                                                | TGCCAGATTTGGCATGTGGGCGTGTGAGCAACAGCGCTTTTCAGCCGGATGGCCAGGCGCCGCTGAGC   |
|          | PtOPR3                                                                | TGCCAGATTTGGCATGTGGGCGTGTGAGCAACAGCGCTTTTCAGCCGGATGGCCAGGCGCCGCTGAGC   |
|          | PtOPR1                                                                | TGCCAGCTGTGGCATGTGGGCGTGTGAGCAACCGTGTATTTTCAGCCGAACGGCCAGGCGCCGATTAGC  |
|          | AtOPR01-1                                                             | TGCCAGCTGTGGCATGTGGGCGTGTGAGCCATCAGGATTTTCAGCCGAACGGCCAGGCGCCGCTGAGC   |
| Sub. II  | AtOPR01-4                                                             | TGCCAGATTTGGCATGTGGGCGTGTGAGCAACAGCGCTTTTCAGCCGAACGGCCAGGCGCCGATTAGC   |
|          | AtOPR01-5                                                             | TGCCAGATTTGGCATGTGGGCGTGTGAGCAACAGCGCTTTTCAGCCGGTCTTCAGGCGCCGATTAGC    |
|          | MtOPR05-2                                                             | TGCCAGATTTGGCATGTGGGCGTGTGAGCAACAGCGCTTTTCAGCCGAACGGCCAGGCGCCGATTAGC   |
|          | MtOPR05-7                                                             | TGCCAGATTTGGCATGTGGGCGTGTGAGCAACAGCGCTTTTCAGCCGAACGGCCAGGCGCCGATTAGC   |
|          | MtOPR05-1                                                             | TGCCAGATTTGGCATGTGGGCGTGTGAGCAACAGCGCTTTTCAGCCGAACGGCCAGGAAACCGATTAGC  |
|          | MtOPR05-3                                                             | TGCCAGATTTGGCATGTGGGCGTGTGAGCAACAGCATTTTCAGCCGAACGGCCAGGCGCCGATTAGC    |
|          | MtOPR05-4                                                             | TGCCAGATTTGGCATGTGGGCGTGTGAGCGATACCTGTTTTCAGCCGAACGGCCAGGCGCCGATTAGC   |
|          | MtOPR05-5                                                             | TGCCAGATTTGGCATGTGGGCGTGTGAGCGATACCTGTTTTCAGCCGAACGGCCAGGCGCCGATTAGC   |
|          | MtOPR05-6                                                             | TGCCAGATTTGGCATGTGGGCGTGTGAGCGATAACCTGTATTCAGCCGAACGGCCAGGCGCCGATTAGC  |
|          | PpOPR4                                                                | TGCCAGATTTGGCATGTGGGCGTGTGAGCCATGCGAGCTATCAGCCGAACGGCCGCGGCGCCGCTGAGC  |
|          | PpOPR5                                                                | TGCCAGATTTGGCATGTGGGCGTGTGAGCCATAACAGCTATCATCCGAACGGCCGCGGCGCCGCTGAGC  |
|          | PpOPR2                                                                | TGCCAGATTTGGCATGTGGGCGTGTGAGCCATAACAGCTATTAACAAAGGCAACGCGCCGCTGAGC     |
| Sub. VII | PpOPR1                                                                | TGCCAGCTGTGGCATGTGGGCGTGTGAGCCATAACAGCTATCAGCCGGATGGCGTGTTCGCGCTGAGC   |
|          | SmOPR1                                                                | CTGCAGATTTGGCATGTGGGCGTGTGAGCCATAACAGCTATCAGCCGATGGCGAAGCGCCGCTGAGC    |
|          | SmOPR2                                                                | CTGCAGATTTGGCATGTGGGCGTGTGAGCCATAACAGCTATCAGCCGAAACGGCCAGGCGCCGCTGAGC  |
|          | SmOPR3                                                                | CTGCAGATTTGGCATGTGGGCGTGTGAGCCATAACAGCTATCAGCCGAAAGGGCCAGGCGCCGATTAGC  |
|          | SmOPR4                                                                | CTGCAGATTTGGCATGTGGGCGTGTGAGCCATAACAGCTATCAGCCGAAAGGGCCAGGCGCCGATTAGC  |
|          | SmOPR6                                                                | CTGCAGATTTGGCATGTGGGCGTGTGAGCCATAACAGCTATCAGCCGAAAGGGCCAGGCGCCGATTAGC  |
|          | PpOPR3                                                                | GC-CAGATTTGGCATGTGGGCGTGTGAGCCATAAAATATCATCAGCCGAACGGCCGCGGCGCCGCTGAGC |
|          | SmOPR5                                                                | TGCCAGCTGTGGCATGTGGGCGTGTGAGCCATAACAGCTATTCAGCCGGTGGCCAGGCGCCGCTGAGC   |
|          | PpOPR6                                                                | CTGCAGCTGTGGCATGTGGGCGTGTGAGCCATAACAGCTATTCAGCCGGGAAAGCGGCGCCGATTAGC   |
|          | PtOPR4                                                                | TGCCAGCTGTGGCATGTGGGCGTGTGAGCCATCAGGTGTATCAGCCGGGCGGCGGGCGGCGATTAGC    |
|          | PtOPR5                                                                | TGCCAGCTGTGGCATGTGGGCGTGTGAGCCATCAGGTGTATCAGCCGGGCGGCGGGCGGCGATTAGC    |
|          | AtOPR02-1                                                             | TGCCAGCTGTGGCATGTGGGCGTGTGAGCCATCAGGTGTATCAGCCGAACGGCCGAGCCGATTAGC     |
| Sub. III | OsOPR8-1                                                              | TGCCAGCTGTGGCATGTGGGCGTGTGAGCCATCAGGTGTATCAGCCGAACGGCCGCGGCGCCGATTAGC  |
|          | ZmOPR01-1                                                             | TGCCAGCTGTGGCATGTGGGCGTGTGAGCCATCAGGTGTATCAGCCGGGCGGCGGGCGCCGATTAGC    |
|          | SbOPR07-1                                                             | TGCCAGCTGTGGCATGTGGGCGTGTGAGCCATCAGGTGTATCAGCCGGGCGGCGGGCGCCGATTAGC    |
|          | ZmOPR04-1                                                             | TGCCAGCTGTGGCATGTGGGCGTGTGAGCCATCAGGTGTATCAGCCGGGCGGCGGGCGCCGATTAGC    |
| Sub. IV  | VcOPR1                                                                | TGCCAGCTGTGGCATGTGGGCGTGTGAGCCATCCGAACTGCAGCCGGGCGGCGGGCGCCGCTGAGC     |
|          | CrOPR2                                                                | TGCCAGCTGTGGCATACCGGCGTGTGAGCCATAGCATCTGCAGCCGGGAAACAGCTGCAGGATTAGC    |
|          | CrOPR3                                                                | TGCCAGCTGTGGCATACCGGCGTGTGAGCCATAACGATCTGCAGCCGATGGCACCGCCGATTAGC      |
|          | CrOPR1                                                                | CG-CAGCTGTTCATGCGGGCGTGTGAGCCATAAGCAGCTGTGGTGGGCAACCAACCGTGTGAGC       |
| VcOPR2   | TG-CAGCTGTTCATGCGGGCGTGTGAGCCATAAGCAGCTGTGGTGGGCAACCAACCGTGTGAGC      |                                                                        |



570 580 590 600 610 620 630

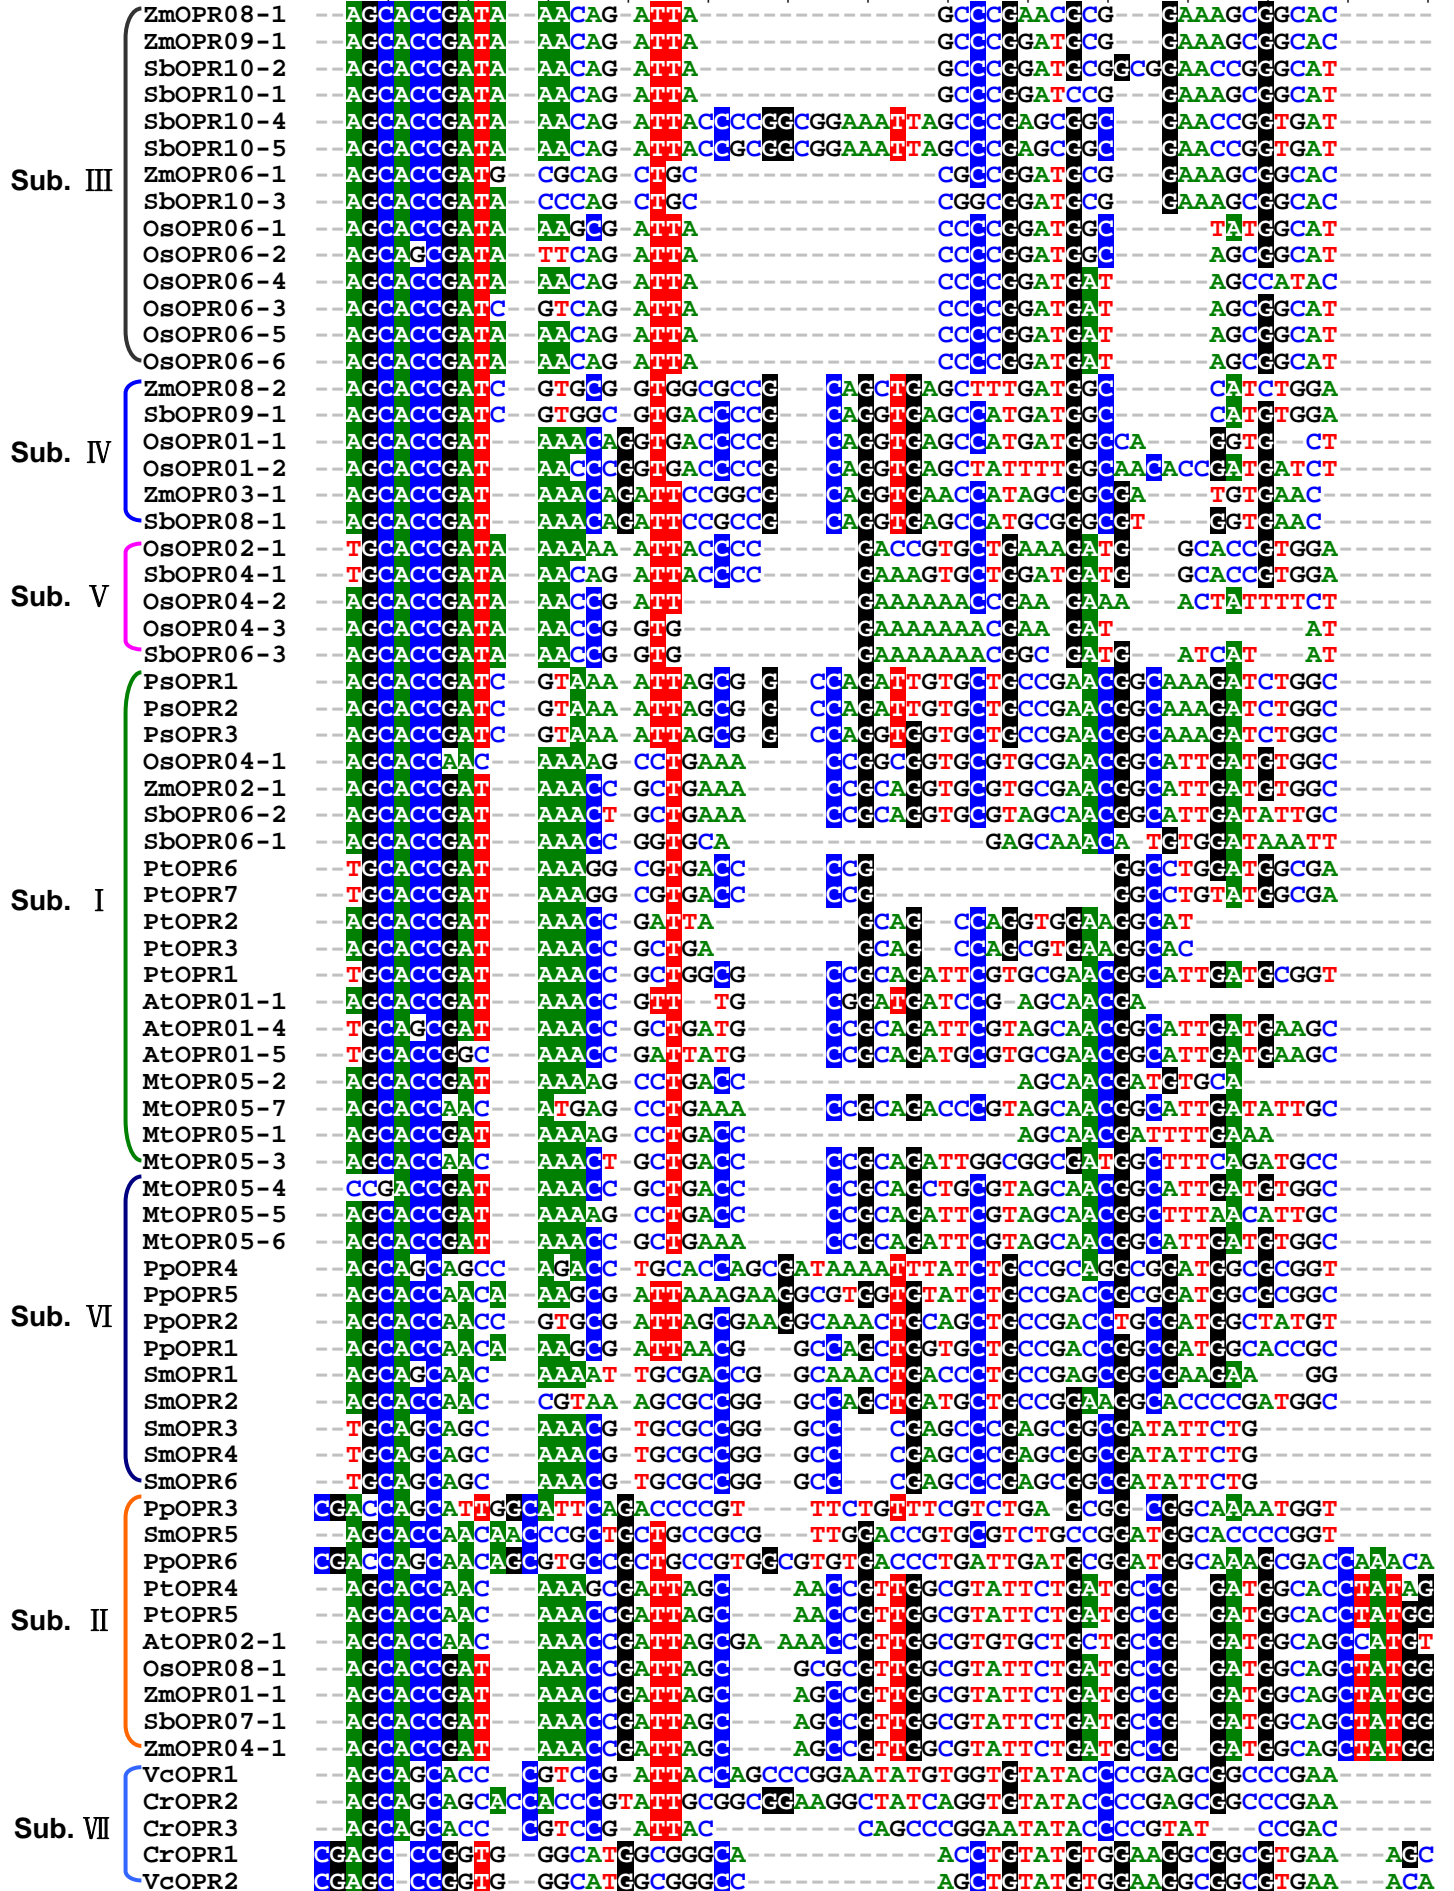



710 720 730 740 750 760 770

|           |                      |                        |                           |                            |
|-----------|----------------------|------------------------|---------------------------|----------------------------|
| Sub. III  | ZmOPR08-1            | GCGCGTAAACGCGCTGGAAG   | CGGGCTTTGATGCGGTGAAATT    | CATGGCGCGCATGGCTATCTGCTGG  |
|           | ZmOPR09-1            | GCGCGTAAACGCGATTGAGG   | CGGGCTTTGATGCGGTGAAATT    | CATGGCGCGCATGGCTATCTGCTGG  |
|           | SbOPR10-2            | GCGCGTAAACGCGCTGGAAG   | CGGGCTTTGATGGCGTGAAATT    | CATGGCGCGAACGGCTATCTGCTGG  |
|           | SbOPR10-1            | GCGCGTAAACGCGATTGAAG   | CGGGCTTTGATGGCGTGAAATT    | CATGGCGCGCATGGCTATCTGCTGG  |
|           | SbOPR10-4            | GCGCGTAAACGCGATTGAAG   | CGGGCTTTGATGGCGTGAAATT    | CATGGCGCGCATGGCTTTTATTCTGG |
|           | SbOPR10-5            | GCGCGTAAACGCGATTGAAG   | CGGGCTTTGATGGCGTGAAATT    | CATGGCGCGCATGGCTTTTATTCTGG |
|           | ZmOPR06-1            | GCGCGTAAACGCGATTGAAG   | CGGGCTTTGATGGCGTGAAATT    | CATGGCGCGCATGGCTTTCTGCTGG  |
|           | SbOPR10-3            | GCGCGTAAACGCGATTGAAG   | CGGGCTTTGATGGCGTGAAATT    | CATGGCGCGCATGGCTTTCTGCTGG  |
|           | OsOPR06-1            | GCGCGTAAACGCGCTGGAAG   | CGGGCTTTGATGGCGTGAAATT    | CATGGCGCGAACGGCTATCTGCTGG  |
|           | OsOPR06-2            | GCGCGTAAACGCGATTGAAG   | CGGGCTTTGATGGCGTGAAATT    | CATGGCGCGAACGGCTATCTGCTGG  |
|           | OsOPR06-4            | GCGCGTAAACGCGATTGAAG   | CGGGCTTTGATGGCGTGAAATT    | CATGGCGCGCATGGCTATCTGATTG  |
|           | OsOPR06-3            | GCGCGTAAACGCGATTGAAG   | CGGGCTTTGATGGCGTGAAATT    | CATGGCGCGCATGGCTATCTGCTGG  |
| OsOPR06-5 | GCGCGTAAACGCGATTGAA  | CGGGCTTTGATGGCGTGAAATT | CATGGCGCGCATGGCTATCTGCTGG |                            |
| OsOPR06-6 | GCGCGTAAACGCGATTGAAG | CGGGCTTTGATGGCGTGAAATT | CATGGCGCGCATGGCTATCTGCTGG |                            |
| Sub. IV   | ZmOPR08-2            | GCGCGTAAACGCGCTGCTGG   | CGGGCTTTGATGGCGTGAAATT    | CATGGCGCGAACGGCTATCTGATTG  |
|           | SbOPR09-1            | GCGCGTAAACGCGATTGATG   | CGGGCTTTGATGGCGTGAAATT    | CATGGCGCGAACGGCTATCTGATTG  |
|           | OsOPR01-1            | GCGCGTAAACGCGATTGAAG   | CGGGCTTTGATGGCGTGAAATT    | CATGGCGCGAACGGCTATCTGATTG  |
|           | OsOPR01-2            | GCGCGTAAACGCGATTGAAG   | CGGGCTTTGATGGCGTGAAATT    | CATGGCGCGAACGGCTATCTGCTGC  |
|           | ZmOPR03-1            | GCGCGTAAACGCGATTGAAG   | CGGGCTTTGATGGCGTGAAATT    | CATGGCGCGAACGGCTATCTGTTTG  |
| Sub. V    | SbOPR08-1            | GCGCGTAAACGCGATTGAAG   | CGGGCTTTGATGGCGTGAAATT    | CATGGCGCGAACGGCTATCTGTTTG  |
|           | OsOPR02-1            | GCGCGTAACTGCATTGAAG    | CGGGCTTTGATGGCGTGAAATT    | CATGGCGCGTTTGGCTATCTGATTG  |
|           | SbOPR04-1            | GCGCGTAACTGCATTGAAG    | CGGGCTTTGATGGCGTGAAATT    | CATGGCGCGTTTGGCTATCTGATTG  |
|           | OsOPR04-2            | GCGAAAACGCGCTGGAAG     | CGGGCTTTGATGGCGTGAAATT    | CATGGCGCGAACGGCTTTCTGCTGG  |
| Sub. I    | OsOPR04-3            | GCGCGTAAACGCGATTGATG   | CGGGCTTTGATGGCGTGAAATT    | CATGGCGCGCATGGCTTTCTGCTGG  |
|           | SbOPR06-3            | GCGCGTAAACGCGCTGGAAG   | CGGGCTTTGATGGCGTGAAATT    | CATGGCGCGCATGGCTTTCTGCTGG  |
|           | PsoPR1               | GCGCGTAAACGCGATTGAAG   | CGGGCTTTGATGGCGTGAAATT    | CATGGCGCGCATGGCTATCTGATTG  |
|           | PsoPR2               | GCGCGTAAACGCGATTGAAG   | CGGGCTTTGATGGCGTGAAATT    | CATGGCGCGCATGGCTATCTGATTG  |
|           | PsoPR3               | GCGCGTAAACGCGATTGAAG   | CGGGCTTTGATGGCGTGAAATT    | CATGGCGCGCATGGCTATCTGCTGG  |
|           | OsOPR04-1            | GCGCGTAAACGCGATTGAAG   | CGGGCTTTGATGGCGTGAAATT    | CATGGCGCGCATGGCTATCTGATTG  |
|           | ZmOPR02-1            | GCGCGTAAACGCGATTGAAG   | CGGGCTTTGATGGCGTGAAATT    | CATGGCGCGCATGGCTATCTGATTG  |
|           | SbOPR06-2            | GCGCGTAAACGCGCTGGAAG   | CGGGCTTTGATGGCGTGAAATT    | CATGGCGCGCATGGCTATCTGATTG  |
|           | SbOPR06-1            | GCGCGTAAACGCGATTGAAG   | CGGGCTTTGATGGCGTGAAATT    | CATGGCGCGCATGGCTATCTGATTG  |
|           | PtOPR6               | GCGCGTAAACGCGATTGAAG   | CGGGCTTTGATGGCGTGAAATT    | CATGGCGCGAACGGCTATCTGATTG  |
|           | PtOPR7               | GCGCGTAAACGCGATTGAAG   | CGGGCTTTGATGGCGTGAAATT    | CATGGCGCGAACGGCTATCTGATTG  |
|           | PtOPR2               | GCGCGTAAACGCGATTGAAG   | CGGGCTTTGATGGCGTGAAATT    | CATGGCGCGCATGGCTATCTGATTG  |
|           | PtOPR3               | GCGCGTAAACGCGATTGAAG   | CGGGCTTTGATGGCGTGAAATT    | CATGGCGCGCATGGCTATCTGAGCG  |
|           | PtOPR1               | GCGCGTAAACGCGATTGAAG   | CGGGCTTTGATGGCGTGAAATT    | CATGGCGCGCATGGCTATCTGATTG  |
|           | AtOPR01-1            | GCGCGTAAACGCGACCGAAG   | CGGGCTTTGATGGCGTGAAATT    | CATGGCGCGCATGGCTATCTGATTG  |
|           | AtOPR01-4            | GCGCGTAAACGCGATTGAAG   | CGGGCTTTGATGGCGTGAAATT    | CATGGCGCGAACGGCTATCTGATTG  |
|           | AtOPR01-5            | GCGCGTAAACGCGATTGAAG   | CGGGCTTTGATGGCGTGAAATT    | CATGGCGCGCATGGCTATCTGATTG  |
|           | Sub. VI              | MtOPR05-2              | GCGCGTAAACGCGATTGAAG      | CGGGCTTTGATGGCGTGAAATT     |
| MtOPR05-7 |                      | GCGCGTAAACGCGATTGCGG   | CGGGCTTTGATGGCGTGAAATT    | CATGGCGCGCATGGCTATCTGCTGG  |
| MtOPR05-1 |                      | GCGCGTAAACGCGATTGAAG   | CGGGCTTTGATGGCGTGAAATT    | CATGGCGCGCATGGCTATCTGCTGG  |
| MtOPR05-3 |                      | GCGCGTAAACGCGATTGAAG   | CGGGCTTTGATGGCGTGAAATT    | CATGGCGCGCATGGCTATCTGCTGG  |
| MtOPR05-4 |                      | GCGCGTAAACGCGATTGAAG   | CGGGCTTTGATGGCGTGAAATT    | CATGGCGCGAACGGCTATATTCTGG  |
| MtOPR05-5 |                      | GCGCGTAAACGCGATTGAAG   | CGGGCTTTGATGGCGTGAAATT    | CATGGCGCGCATGGCTATCTGCTGG  |
| MtOPR05-6 |                      | GCGCGTAAACGCGATTGAAG   | CGGGCTTTGATGGCGTGAAATT    | CATGGCGCGCATGGCTATCTGCTGG  |
| PpOPR4    |                      | GCGCGTAAACGCGATTGAAG   | CGGGCTTTGATGGCGTGAAATT    | CATGGCGCGCATGGCTTTCTGATTG  |
| PpOPR5    |                      | GCGCGTAAACGCGCTGAAG    | CGGGCTTTGATGGCGTGAAATT    | CATGGCGCGCATGGCTATCTGATTG  |
| PpOPR2    |                      | GCGCGTAACTGATTGAAG     | CGGGCTTTGATGGCGTGAAATT    | CATGGCGCGCATGGCTATCTGATTG  |
| PpOPR1    |                      | GCGCGTAAACGCGATTGAAG   | CGGGCTTTGATGGCGTGAAATT    | CATGGCGCGCATGGCTATCTGATTG  |
| SmOPR1    |                      | GCGCGTAAACGCGATTGCGG   | CGGGCTTTGATGGCGTGAAATT    | CATGGCGCGCATGGCTATCTGATTG  |
| Sub. II   | SmOPR2               | GCGCGTAAACGCGATTGCGT   | CGGGCTTTGATGGCGTGAAATT    | CATGGCGCGCATGGCTATCTGATTG  |
|           | SmOPR3               | GCGCGTAAACGCGATTGAAG   | CGGGCTTTGATGGCGTGAAATT    | CATGGCGCGCATGGCTATCTGATTG  |
|           | SmOPR4               | GCGCGTAAACGCGATTGAAG   | CGGGCTTTGATGGCGTGAAATT    | CATGGCGCGCATGGCTATCTGATTG  |
|           | SmOPR6               | GCGCGTAAACGCGATTGAAG   | CGGGCTTTGATGGCGTGAAATT    | CATGGCGCGCATGGCTATCTGATTG  |
|           | PpOPR3               | GCGAAAACGCGATTGCGG     | CGGGCTTTGATGGCGTGAAATT    | CATGGCGCGCATGGCTATCTGCTGG  |
|           | SmOPR5               | GCGCGTAAACGCGCTGCGG    | CGGGCTTTGATGGCGTGAAATT    | CATGGCGCGCATGGCTATCTGCTGG  |
|           | PpOPR6               | GCGAAAACGCGCTGGAAG     | CGGGCTTTGATGGCTGCGAATT    | CATGGCGCGCATGGCTATATTCTGG  |
|           | PtOPR4               | GCGCTGAACGCGATTCTGT    | CGGGCTTTGATGGCGTGAAATT    | CATGGCGGCTATGGCTATCTGATTG  |
|           | PtOPR5               | GCGCTGAACGCGATTCTGT    | CGGGCTTTGATGGCGTGAAATT    | CATGGCGGCTATGGCTATCTGATTG  |
|           | AtOPR02-1            | GCGCTGAACGCGATTCTGT    | CGGGCTTTGATGGCTTGAATT     | CATGGCGCGCATGGCTATCTGATTG  |
|           | OsOPR08-1            | GCGATTAAACGCGATTGAAG   | CGGGCTTTGATGGCATGAAATT    | CATGGCGCGCATGGCTATATTATTG  |
|           | ZmOPR01-1            | GCGGTGAACGCGATTGAAG    | CGGGCTTTGATGGCATGAAATT    | CATGGCGCGCATGGCTATCTGATTG  |
| Sub. VII  | SbOPR07-1            | GCGATTAAACGCGATTGAAG   | CGGGCTTTGATGGCATGAAATT    | CATGGCGCGCATGGCTATCTGATTG  |
|           | ZmOPR04-1            | GCGATTAAACGCGATTGAAG   | CGGGCTTTGATGGCATGAAATT    | CATGGCGCGCATGGCTATCTGATTG  |
|           | VcOPR1               | GCGAAAACGCGATTGAAGTGG  | CGGGCTTTGATGGCGTGAAATT    | CATGGCGCGAACGGCTATTTTATTG  |
|           | CrOPR2               | GCGGTGGCGCGCTGGAAGTGG  | CGGGCTTTGATGGCGTGAAATT    | CATGGCGCGAACGGCTATCTGATTG  |
|           | CrOPR3               | GCGGTGGCGCGCTGGAAGTGG  | CGGGCTTTGATGGCGTGAAATT    | CATGGCGCGAACGGCTATCTGATTG  |
| CrOPR1    | GCGCTGCGTGCATTGAGG   | CGGGCTTTGATGGCATGAAATT | CATGGCGCGAACGGCTATCTGCTGC |                            |
| VcOPR2    | GCGGTGCGTGCATTGAGG   | CGGGCTTTGATGGCATGAAATT | CATGGCGCGAACGGCTATCTGCTGC |                            |

780 790 800 810 820 830 840

|           |                                                           |                                                           |                                                                         |      |
|-----------|-----------------------------------------------------------|-----------------------------------------------------------|-------------------------------------------------------------------------|------|
| Sub. III  | ZmOPR08-1                                                 | AA CAG TTT AT GAA A GAT AG C T G C A A C G A T            | CGT ACC GAT C A G T                                                     | ATGG |
|           | ZmOPR09-1                                                 | AA CAG TTT AT GAA A GAT AG C T G C A A C G A T            | CGT ACC GAT C A G T                                                     | ATGG |
|           | SbOPR10-2                                                 | AA CAG TTT AT GAA A GAT G C C G C G A A C G A T           | CGT G A T G A T G A A T                                                 | ATGG |
|           | SbOPR10-1                                                 | AA CAG TTT AT GAA A GAT G C C A C C A A C G A T           | CGT G A T G A T G A A T                                                 | ATGG |
|           | SbOPR10-4                                                 | AA CAG TTT AT GAA A GAT A G C A G C A A C G A T           | CGT ACC GAT G A A T                                                     | ATGG |
|           | SbOPR10-5                                                 | AA CAG TTT AT GAA A GAT A G C A G C A A C G A T           | CGT ACC GAT G A A T                                                     | ATGG |
|           | ZmOPR06-1                                                 | AA CAG TTT AT GAA A GAT G C C G C G A A C G A T           | CGT G C G A T G A A T                                                   | ATGG |
|           | SbOPR10-3                                                 | AA CAG TTT AT GAA A GAT G C C G C G A A C G A T           | CGT ACC GAT G A A T                                                     | ATGG |
|           | OsOPR06-1                                                 | AA CAG TTT AT GAA A GAT A G C A G C A A C G A T           | CGT ACC GAT G A A T                                                     | ATGG |
|           | OsOPR06-2                                                 | AA CAG TTT AT GAA A GAT A G C A G C A A C G A T           | CGT A C C G A T G A A T                                                 | ATGG |
|           | OsOPR06-4                                                 | A T C A G T T T A T G A A A G A T A G C G C G A A C G G C | CGT ACC GAT C A G T                                                     | ATGG |
|           | OsOPR06-3                                                 | AA CAG TTT AT GAA A GAT A G C C G A A C G A T             | CGT A G C G A T G A A T                                                 | ATGG |
| OsOPR06-5 | A T C A G T T T A T G A A A G A T A G C G C G A A C G A T | CGT A C C G A T G A A T                                   | ATGG                                                                    |      |
| OsOPR06-6 | AA CAG TTT AT GAA A GAT A G C G C G A A C G A T           | CGT ACC GAT G A A T                                       | ATGG                                                                    |      |
| Sub. IV   | ZmOPR08-2                                                 | AA CAG TTT C T G A A A G A T A G C C G A A C G A T        | CGT G A T G A T G A A T                                                 | ATGG |
|           | SbOPR09-1                                                 | A A C A G T T T A T G A A A G A T A G C C G A A C G A T   | CGT G A T G A T G A A T                                                 | ATGG |
|           | OsOPR01-1                                                 | A T C A G T T T A T G A A A G A T A G C G T G A A C G A T | CGT ACC GAT G C G T                                                     | ATGG |
|           | OsOPR01-2                                                 | A T C A G T T T A T G A A A G C G A G C G T G A A C G A T | CGT ACC GAT G A A T                                                     | ATGG |
| Sub. V    | ZmOPR03-1                                                 | A T C A G T T T A T G A A A G A T A G C A C C A A C G A T | CGT G A T G A T A G C T                                                 | ATGG |
|           | SbOPR08-1                                                 | A T C A G T T T A T G A A A G A T A G C A C C A A C G A T | CGT G A T G A T G C G T                                                 | ATGG |
|           | OsOPR02-1                                                 | AA CAG TTT AT GAA A GAT G C C G T G A A C G A T           | CGT ACC GAT A A A T                                                     | ATGG |
|           | SbOPR04-1                                                 | AA CAG TTT AT GAA A GAT A G C G T G A A C G A T           | CGT A C C G A T G A A T                                                 | ATGG |
| Sub. I    | OsOPR04-2                                                 | A T C A G T T T A T G A A A G A T G C C G T G A A C G G   | CGT G C G G A T G A A T                                                 | ATGG |
|           | OsOPR04-3                                                 | AA CAG TTT AT GAA A GAT G C C G T G A A C G A T           | CGT G C G G A T G A A T                                                 | ATGG |
|           | SbOPR06-3                                                 | AA CAG TTT AT GAA A GAT A G C G T G A A C G A T           | CGT A C C G A T A A A T                                                 | ATGG |
|           | PpOPR1                                                    | A T C A G T T T A T G A A A G A T A G C A T T A A C A A C | CGT ACC GAT G A A T                                                     | ATGG |
|           | PpOPR2                                                    | A T C A G T T T A T G A A A G A T A G C A T T A A C A A C | CGT ACC GAT G A A T                                                     | ATGG |
|           | PpOPR3                                                    | A T C A G T T T A T G A A A G A T A G C A T T A A C A A C | CGT A T T G A T C A G T                                                 | ATGG |
|           | OsOPR04-1                                                 | A T C A G T T T C T G A A A G A T C A G G T G A A C G A T | CGT A C C G A T A A A T                                                 | ATGG |
|           | ZmOPR02-1                                                 | A T C A G T T T C T G A A A G A T G C C G T G A A C G A T | CGT ACC G A T A A A T                                                   | ATGG |
|           | SbOPR06-2                                                 | A T C A G T T T C T G A A A G A T C A G G T G A A C G A T | CGT A C C G A T A A A T                                                 | ATGG |
|           | SbOPR06-1                                                 | A T C A G T T T C T G A A A G A T C A T G T G A A C G A T | CGT ACC G A T A T T T                                                   | ATGG |
|           | PtOPR6                                                    | A T C A G T T T C T G A A A G A T C A G G T G A A C G A T | CGT ACC G A T A A A T                                                   | ATGG |
|           | PtOPR7                                                    | A T C A G T T T C T G A A A G A T C A G G T G A A C G A T | CGT A C C G A T A A C T                                                 | ATGG |
| Sub. VI   | PtOPR2                                                    | A T C A G T T T A T G A A A G A T C A G G T G A A C A A C | CGT ACC G A T C A G T                                                   | ATGG |
|           | PtOPR3                                                    | A T C A G T T T A T G A A A G A T C A G G T G A A C A A C | CGT ACC G A T C A G T                                                   | ATGG |
|           | PtOPR1                                                    | A T C A G T T T A T G A A A G A T C A G G T G A A C G A T | CGT A C C G A T C A G T                                                 | ATGG |
|           | AtOPR01-1                                                 | A T C A G T T T A T G A A A G A T A G C G T G A A C G A T | CGT ACC G A T A G C T                                                   | ATGG |
|           | AtOPR01-4                                                 | A T C A G T T T A T G A A A G A T A C C G T G A A C G A T | CGT ACC G A T G A A T                                                   | ATGG |
|           | AtOPR01-5                                                 | A T C A G T T T A T G A A A G A T A A A G T G A A C G A T | CGT A C C G A T G A A T                                                 | ATGG |
|           | MtOPR05-2                                                 | AA CAG TTT AT GAA A GAT A A A A G T G A A C G A T         | CGT ACC G A T G A A T                                                   | ATGG |
|           | MtOPR05-7                                                 | AA CAG TTT AT GAA A GAT A A A A G T G A A C G A T         | CGT ACC G A T A A A T                                                   | ATGG |
|           | MtOPR05-1                                                 | AA CAG TTT AT GAA A GAT A A A A G T G A A C G A T         | CGT A C C G A T G A A T                                                 | ATGG |
|           | MtOPR05-3                                                 | AA CAG TTT AT GAA A GAT A A A G C G A A C G A T           | CGT ACC G A T G A A T                                                   | ATGG |
|           | MtOPR05-4                                                 | AA CAG TTT AT GAA A GAT C A G G T G A A C G A T           | CGT ACC G A T G A A T                                                   | ATGG |
|           | MtOPR05-5                                                 | AA CAG TTT AT GAA A GAT A A A A G T G A A C G A T         | CGT A C C G A T G A A T                                                 | ATGG |
| MtOPR05-6 | AA CAG TTT AT GAA A GAT A A A A G T G A A C G A T         | CGT ACC G A T G A A T                                     | ATGG                                                                    |      |
| Sub. II   | PpOPR4                                                    | A T C A G T T T C T G A A A G A T G C C A T T A A C G A T | CGT A G C G A T A A A T                                                 | ATGG |
|           | PpOPR5                                                    | A T C A G T T T C T G A A A G A T G C C A T T A A C G A T | CGT A C C G A T A A A T                                                 | ATGG |
|           | PpOPR2                                                    | A T C A G T T T C T G A A A G A T G C C G T G A A C G A T | CGT ACC G A T G A A T                                                   | ATGG |
|           | PpOPR1                                                    | AA CAG TTT C T G A A A A G C A G C G T G A A C G A T      | CGT ACC G A T A A A T                                                   | ATGG |
|           | SmOPR1                                                    | A T C A G T T T C T G A A A G A T G C C G T G A A C G A T | CGT A C C G A T G A A T                                                 | ATGG |
|           | SmOPR2                                                    | A T C A G T T T T T T A A A G A T A G C A C C A A C G A T | CGT ACC G A T G A A T                                                   | ATGG |
|           | SmOPR3                                                    | A T C A G T T T C T G A A A G A T G C C A T T A A C G A T | CGT ACC G A T G G C T                                                   | ATGG |
|           | SmOPR4                                                    | A T C A G T T T C T G A A A G A T G C C A T T A A C G A T | CGT A C C G A T G G C T                                                 | ATGG |
|           | SmOPR6                                                    | A T C A G T T T C T G A A A G A T G C C A T T A A C G A T | CGT ACC G A T G G C T                                                   | ATGG |
|           | PpOPR3                                                    | A T C A G T T T C T G A A A G A T G C C A T T A A C G A T | CGT A A A G A T G A A T                                                 | ATGG |
|           | SmOPR5                                                    | A T C A G T T T C T G A A A G A T G C C A T T A A C G A T | CGT G A T G C G T                                                       | ATGG |
|           | PpOPR6                                                    | A T G C G T T T A T T A A A G A T A C C A T T A A C G A T | CGT A C C G A T G C G T                                                 | ATGG |
| Sub. VII  | PtOPR4                                                    | A T C A G T T T C T G A A A G A T G C C A T T A A C G A T | CGT A T T G A T G A T C T G T G C C A T A C C A G C G C T A T G A T G G | ATGG |
|           | PtOPR5                                                    | A T C A G T T T C T G A A A A C G G C A T T A A C G A T   | CGT G T G G A T G A A T                                                 | ATGG |
|           | AtOPR02-1                                                 | A T C A G T T T C T G A A A G A T G C C A T T A A C G A T | CGT ACC G A T C A G T                                                   | ATGG |
|           | OsOPR08-1                                                 | A T C A G T T T C T G A A A G A T G C C A T T A A C G A T | CGT ACC G A T G A A T                                                   | ATGG |
|           | ZmOPR01-1                                                 | A T C A G T T T C T G A A A G C C G G C A T T A A C G A T | CGT A C C G A T G A A T                                                 | ATGG |
|           | SbOPR07-1                                                 | A T C A G T T T C T G A A A G A T G C C A T T A A C G A A | CGT ACC G A T G A A T                                                   | ATGG |
|           | ZmOPR04-1                                                 | A T C A G T T T C T G A A A G A T G C C A T T A A C G A T | CGT G C G G A T G A A T                                                 | ATGG |
|           | VcOPR1                                                    | A T C A G T T T A T T A A A G A T A G C G T G A A C G A T | CGT A C C G A T G A A T                                                 | ATGG |
|           | CrOPR2                                                    | A T C A G T T T C T G A A A G A T A A C G T G A A C G A T | CGT ACC G A T G A A T                                                   | ATGG |
|           | CrOPR3                                                    | A T C A G T T T A T T A A A G A T A A C G T G A A C G A T | CGT ACC G A T G A A T                                                   | ATGG |
|           | CrOPR1                                                    | A G G C G T T T A T G C G C A G A A A A C C A A C C A G   | CGT A C C G A T A A A T                                                 | ATGG |
|           | VcOPR2                                                    | A G A G C T T T C T G C G A A A A A A A C C A A C C T G   | CGT ACC G A T A A A T                                                   | ATGG |





990 1000 1010 1020 1030 1040 1050

|           |                                     |                                        |                                     |
|-----------|-------------------------------------|----------------------------------------|-------------------------------------|
|           | ZmOPR08-1                           | CCGGTGGCGCTGGGCCATTATATGGTGCAGCAGC     | TGAACCGTCATAGCGGCCTGCTGTATTGCCATA   |
|           | ZmOPR09-1                           | CCGGTGGCGCTGGGCCATTATATGGTGCAGCAGC     | TGAACCGTCATAGCGGCCTGCTGTATTGCCATA   |
|           | SbOPR10-2                           | CCGGCGGCGCTGGCGGATTATATGGTGCCTCAGC     | TGAACCGTCATGAAAGGCTTTCTGTATTGCCATA  |
|           | SbOPR10-1                           | CCGGCTGGCGCTGGGCCAATATATGGTGCAGCAGC    | TGAACCGTCATGAAAGGCTTTCTGTATTGCCATA  |
|           | SbOPR10-4                           | CCGGTGGCGCTGGGCCATTATATGATTCAGCAGC     | TGAACAAAACATGAAAGGCTTTCTGTATTGCCATA |
|           | SbOPR10-5                           | CCGGTGGCGCTGGGCCATTATATGATTCAGCAGC     | TGAACAAAACATGAAAGGCTTTCTGTATTGCCATA |
| Sub. III  | ZmOPR06-1                           | CCGCTGGCGCTGGGCCATTATATGGTGGAAACAGC    | TGAACCGTCATGAAAGGCTTTCTGTATTGCCATA  |
|           | SbOPR10-3                           | CCGATGGCGCTGGGCCAATTATATGGTGCCTCAGC    | TGAACAAAACATGAAAGGCTTTCTGTATTGCCATA |
|           | OsOPR06-1                           | CCGGAAGCGCTGGGCAGCTATATGGTGGAAACAGC    | TGAACAAAACATGAAAGATTTTCTGTATTGCCATA |
|           | OsOPR06-2                           | CCGGAAGCGCTGGGCAGCTATATGGTGGAAACAGC    | TGAACAAAACATGAAAGCTTTCTGTATTGCCATA  |
|           | OsOPR06-4                           | CCGGAAGCGCTGGGCAGCTATATGGTGCCTCAGC     | TGAACAAAACATCCGGAACTTTCTGTATTGCCATA |
|           | OsOPR06-3                           | CCGGTGGCGCTGGGCAGCTATATGGTGCAGCAGC     | TGAACAAAACATCCGGGCTTTCTGTATTGCCATA  |
|           | OsOPR06-5                           | CCGGTGGCGCTGGGCAGCTATATGGTGCAGCAGC     | TGAACAAAACATCCGGGCTTTCTGTATTGCCATA  |
|           | OsOPR06-6                           | CCGGTGGCGCTGGGCAGCTATATGGTGCAGCAGC     | TGAACAAAACATCCGGGCTTTCTGTATTGCCATA  |
|           | ZmOPR08-2                           | CCGGAAGCGCTGGCGGGCTATCTGGTCCGTAGCC     | TGAGCG ATGTGGGCGTCTGTATTGCCATA      |
|           | SbOPR09-1                           | CCGGAAGCGCTGGCGGGCTATCTGGTGGAAAAAC     | TGAGCG AACTGGGCGTCTGTATTGCCATA      |
| Sub. IV   | OsOPR01-1                           | CCGGAAGCTGCTGGCCCTGCGTGTGATTGGAACTGA   | TGAACAACTG GGCCTGCTGTATTGCCATA      |
|           | OsOPR01-2                           | CCGGAAGAACTGGCGCTGCATCTGATTGGCGTGA     | TGAACGGCCTG GGCCTGCTGTATTGCCATG     |
|           | ZmOPR03-1                           | CCGGAAGCGCTGGCGCTGCATCTGATTGATGAAACCT  | TGAACCGCTG GGCCTGCTGTATTGCCATA      |
|           | SbOPR08-1                           | CCGGAAGCGCTGGGCCTGCATCTGATTGATAAAAACCT | TGAACCGCTG GGCCTGCTGTATTGCCATA      |
| Sub. V    | OsOPR02-1                           | CCGGATGCGCTGGGCCTGTATATGATTCAGGCCGA    | TGAGCAAACCTG GGCCTGCTGTATTGCAGCA    |
|           | SbOPR04-1                           | CCGGATGCGCTGGGCCTGTATATGATTCATGCGCA    | TGAACAAACCTG GGCCTGCTGTATTGCAGCA    |
|           | OsOPR04-2                           | CCGGATGCGCTGGGCCTGTATATGATTCATGCGCA    | TGGGAGCCCTG GGCCTGCTGTATTGCAGCA     |
|           | OsOPR04-3                           | CCGGATGCGCTGGGCCTGTATATGATTCATGCGCA    | TGGATCCCTGCTG GGCCTGCTGTATTGCAGCG   |
| SbOPR06-3 | CCGGATCGTCTGGGCCTGTATATGATTCATGCGCA | TGAACCGTTAT AACATTCTGTATTGCAGCG        |                                     |
| Sub. I    | PsoPR1                              | CCGGAAGCGCTGGGCCTGTATATGGCGGAAGCGC     | TGAACCGTTAT AACATTCTGTATGCCATT      |
|           | PsoPR2                              | CCGGAAGCGCTGGGCCTGTATATGGCGGAAGCGC     | TGAACCGTTAT AACATTCTGTATGCCATT      |
|           | PsoPR3                              | CCGGAAGCGCTGGGCCTGTATATGGCGGAACCC      | TGAACCGTTAT AACATTCTGTATGCCATT      |
|           | OsOPR04-1                           | CCGGAAGCGCTGGGCCTGTATATGGCGGAAGCGC     | TGAACAAATTT GGCATTCTGTATTGCCATA     |
|           | ZmOPR02-1                           | CCGGAAGCGCTGGGCCTGTATATGGCGAAGCGC      | TGAACAAATTT GGCATTCTGTATTGCCATA     |
|           | SbOPR06-2                           | CCGGAAGCGCTGGGCCTGTATATGGCGAAGCGC      | TGAACAAATTT GGCATTCTGTATTGCCATA     |
|           | SbOPR06-1                           | CCGGAAGCGCTGGGCCTGTATATGGCGAAGCGC      | TGAACAAATTT GGCATTCTGTATTGCCATG     |
|           | PtOPR6                              | CCGGAAGAACTGGGCCTGTATATGGCGAAGCGC      | TGAACAAATTT GGCATTCTGTATTGCCATG     |
|           | PtOPR7                              | CCGGAAGAACTGGGCCTGTATATGGCGAAGCGC      | TGAACAAATTT GGCATTCTGTATTGCCATG     |
|           | PtOPR2                              | CCGGAAGCGCTGGGCCTGTATATGGTGAAGAAAC     | TGAACAAATAT GGCATTCTGTATTGCCATA     |
|           | PtOPR3                              | CCGGAAGCGCTGGGCCTGCATATGGTGAAGAAAC     | TGAACAAATAT GGCATTCTGTATTGCCATA     |
|           | PtOPR1                              | CCGGGCGCGCTGGGCCTGTATATGGTGAAGAAAC     | TGAACAAATAT GGCATTCTGTATTGCCATA     |
|           | AtOPR01-1                           | CCGAAACCTCTGGGCCTGTATATGGCGAAGAAAC     | TGAACCGTTTT GAAATCTGTATTGCCATA      |
|           | AtOPR01-4                           | CCGGGCGCGCTGGGCCTGTATATGGCGAAGAAAC     | TGAACAAATAT GGCATTCTGTATTGCCATG     |
| AtOPR01-5 | CCGAAACCTCTGGGCCTGTATATGGTGAAGAAAC  | TGAACAAATAT GGCATTCTGTATTGCCATA        |                                     |
| Sub. VI   | MtOPR05-2                           | CCGAAACGAACTGGGCCTGCATATGGTGAAGAAAC    | TGAACAAATAT AACATTCTGTATTGCCATA     |
|           | MtOPR05-7                           | CCGGAAGAACTGGGCCTGTATATGGTGAAGCGC      | TGAGCAAATAT AACATTCTGTATTGCCATA     |
|           | MtOPR05-1                           | CCGACCGAACTGGGCCTGTATATGGTGAAGCGC      | TGAACAAATAT AACATTCTGTATTGCCATA     |
|           | MtOPR05-3                           | CCGACGAACTGGGCCTGTATATGGTGAAGCGC       | TGAACAAATAT GGCATTCTGTATTGCCATA     |
|           | MtOPR05-4                           | CCGCGTGAACCTGGGCCTGTATATGGCGAAGCGC     | TGAACAAATAT GGCATTCTGTATTGCCATG     |
|           | MtOPR05-5                           | CCGAAACGAACTGGGCCTGTATATGGTGAAGCGC     | TGAACAAATAT GGCATTCTGTATTGCCATA     |
|           | MtOPR05-6                           | CCGAAACGAACTGGGCCTGTATATGGTGAAGCGC     | TGAACAAATAT GGCATTCTGTATTGCCATA     |
|           | PpOPR4                              | GCGACCGGCTGAGCGTGTCTTCTGGCGAAGAAAC     | TGAACCGTTAT AACCTGCTGTATCTGATGG     |
|           | PpOPR5                              | CCGAAACGCTGAGCGTGTATATGGCGAAGAAAC      | TGAACCGTTAT AACCTGCTGTATCTGCATG     |
|           | PpOPR2                              | CCGACCGGCTGAGCGTGTATATGGCGAAGAAAC      | TGAACAAATAT AACCTGCTGTATCTGCATG     |
| Sub. II   | PpOPR1                              | CCGGTGGCGCTGGGCCTGAGCATTGCGCAGGCGC     | TGAACAAATAT AACCTGATGTATCTGCATT     |
|           | SmOPR1                              | CCGCAAGAACTGGGCCTGTATCTGATTCAGGCGC     | TGAACAGCGCG AACCTGGTGTATGTGCATC     |
|           | SmOPR2                              | CCGCTGACCTGGGCCTGTATATGGCGAAGAAAC      | TGAACCGTTTT AACATTCTGTATGCCATT      |
|           | SmOPR3                              | CCGATGAAACTGGCGGTGTCTTCTGGCGAAGCGC     | TGAACCGTTAT AACATTCTGTATGTG         |
|           | SmOPR4                              | CCGATGAAACTGGCGGTGTCTTCTGGCGAAGCGC     | TGAACCGTTAT AACATTCTGTATGTG         |
|           | SmOPR6                              | CCGATGAAACTGGCGGTGTCTTCTGGCGAAGCGC     | TGAACCGTTAT AACATTCTGTATGTG         |
|           | PpOPR3                              | CCGGTGGCGCTGGGCCTGCATCTGGCCGTAACC      | TGAGCCGTTTT AACCTGGCGTATCTGCATG     |
|           | SmOPR5                              | CCGGTGGCGCTGGGCCTGCATCTGGCCGCGGCT      | TGGTGAACCTG GGCCTGCTGTATCTGCATG     |
|           | PpOPR6                              | CCGGAAGCGCTGTTTACCTATCTGCATAGCAAAC     | TGGATAAATTT GGCCTGGCGTATATTCACT     |
|           | PtOPR4                              | CCGCTGAACCTGGGCCTGAGCGTGAATGAACGTA     | TTTAAACAAACTGCAGCTGCAGGTGGGCAGCAAAC |
| PtOPR5    | CCGCTGAACCTGGGCCTGAGCGTGAATGAACGTA  | TTTAAACAAACTGCAGCTGCAGGTGGGCAGCAAAC    |                                     |
| Sub. VII  | AtOPR02-1                           | CCGCTGAGCTGGGCCTGGCGGTGGTGGGCATG       | CTGAACAAACTGCAGGGCTGAAACGGCAGCAAAC  |
|           | OsOPR08-1                           | CCGATTTAAACTGGGCATGGCGGTGGTGGAAACGTC   | TGAACGCGCTGCAGCAGCAGAGCGGCCCTGCTG   |
|           | ZmOPR01-1                           | CCGCTGCACTGGGCCTGGCGGTGGTGGAAACGTC     | TGAACGCGCTGCAGCAGGAAAGCGGCCCTGCTG   |
|           | SbOPR07-1                           | CCGCTGCACTGGGCCTGGCGGTGGTGGAAACGTC     | TGAACGCGCTGCAGCAGGAAAGCGGCCCTGCTG   |
|           | ZmOPR04-1                           | CCGCTGCACTGGGCCTGGCGGTGGTGGAAACGTC     | TGAACGCGCTGCAGGAAAGAAACCGGCCCTGCTG  |
| Sub. VII  | VcOPR1                              | CCGTATGGCAACCAACCTGTATCTGCTGGAACAGC    | TGAACAAATAT GGCCTGAGCTATATTGATA     |
|           | CrOPR2                              | CCGTATGGCAACCAACCTGTATCTGCTGGAACAGC    | TGAACAAACTG GGCCTGGCGTATGTGCATA     |
|           | CrOPR3                              | CCGTATGGCAACCAACCTGTATCTGCTGGAACAGC    | TGAACAAATTT GGCCTGGCGTATGTGCATA     |
|           | CrOPR1                              | GTGAACGAAACCTTGAATATCTGGCCCGGAAC       | TGAGCAAACCT AACCTGGCGTATGTGTGCC     |
|           | VcOPR2                              | GTGCTGAAACCTTGAATATCTGGCCCGGAAC        | TGAGCAAACCT AACCTGGCGCTTTGTGACCC    |





1130 1140 1150 1160 1170 1180 1190

|           |                                                   |                                                        |                    |
|-----------|---------------------------------------------------|--------------------------------------------------------|--------------------|
|           | ZmOPR08-1                                         | T CAGATTCCGCATGGCTGCTGCCGTTTCGTAAAGCGTTTCAT            | GGCACCTTTATTGCGGCG |
|           | ZmOPR09-1                                         | T CAGATTCCGCATGGCTGCTGCCGTTTCGTAAAGCGTTTCAT            | GGCACCTTTATTGCGGCG |
|           | SbOPR10-2                                         | T CAGATTCCGCATGGCTGCTGCCGTTTCGTAAAGCGTTTAAA            | GGCACCTTTATTGCGGCG |
|           | SbOPR10-1                                         | T CAGATTCCGCATGGCTGCTGCCGTTTCGTAAAGCGTTTAAAC           | GGCACCTTTATTGCGGCG |
|           | SbOPR10-4                                         | T CAGATTCCGCATGGCTGCTGCCGTTTCGTAAAGCGTTTCAT            | GGCACCTTTATTGCGGCG |
|           | SbOPR10-5                                         | T CAGATTCCGCATGGCTGCTGCCGTTTCGTAAAGCGTTTCAT            | GGCACCTTTATTGCGGCG |
| Sub. III  | ZmOPR06-1                                         | T CAGATTCCGCATGGCTGCTGCCGTTTAAAGCGGCGTTTAAAC           | GGCACCTTTATTGCGGCG |
|           | SbOPR10-3                                         | T CAGATTCCGCATGGCTGCTGCCGTTTAAAAA CCGTGTTTAGC          | GGCACCTTTATTGCGGCG |
|           | OsOPR06-1                                         | T CAGATTCCGCATGGCTGCTGCCGTTTCGTAAACAGTTTAAAC           | GGCACCTTTATTGCGGCG |
|           | OsOPR06-2                                         | T CAGATTCCGCATGGCTGCTGCCGTTTCGTAAACAGTTTAAAC           | GGCACCTTTATTGCGGCG |
|           | OsOPR06-4                                         | T AAAAATTAAACCATGGCTGCTGCCGTTTCGTAAACAGTTTAAAC         | GGCACCTTTATTGCGGCG |
|           | OsOPR06-3                                         | T AAAAATTAAACCATGGCTGCTGCCGTTTCGTAAACAGTTTAAAC         | GGCACCTTTATTGCGGCG |
|           | OsOPR06-5                                         | T AAAAATTAAACCATGGCTGCTGCCGTTTCGTAAACAGTTTAAAC         | GGCACCTTTATTGCGGCG |
|           | OsOPR06-6                                         | T AAAAATTAAACCATGGCTGCTGCCGTTTCGTAAACAGTTTAAAC         | GGCACCTTTATTGCGGCG |
| Sub. IV   | ZmOPR08-2                                         | T CAGATTCCGCATGGCTGCTGCCGTTTCGTAAAGCGTTTCAT            | GGCACCTTTATTGCGGCG |
|           | SbOPR09-1                                         | T CAGATTCCGCATGGCTGCTGCCGTTTCGTAAAGCGTTTCAT            | GGCACCTTTATTGCGGCG |
|           | OsOPR01-1                                         | CCGGTGGATTGCGCATGGCCGCTCTGCTGCCGTTTCGTAAAGCGTTTCAT     | GGCACCTTTATTGCGGCG |
|           | OsOPR01-2                                         | CGCCGAGCGTCCGCGCCGCGCGCGCGGTCGAGAAAGCGTCCGCG           | GGCACCTTTATTGCGGCG |
|           | ZmOPR03-1                                         | CCCTGGAAATATGCTGCTGCCGTTTCGTAAAGCGTTTCAT               | GGCACCTTTATTGCGGCG |
|           | SbOPR08-1                                         | CCCTGACGAGATGCTGCTGCCGTTTCGTAAAGCGTTTCAT               | GGCACCTTTATTGCGGCG |
| Sub. V    | OsOPR02-1                                         | TGCAGATTCCGCATATAAACTGTGGCATTTCGTAAAGTGTTTGCG          | GGCACCTTTATTGCGGCG |
|           | SbOPR04-1                                         | TGCAGATTCCGCATATAAACTGTGGCATTTCGTAAAGCGTTTAAAC         | GGCACCTTTATTGCGGCG |
|           | OsOPR04-2                                         | ATGCGTATTCCGCATGGCTGCTGCCGTTTCGTAAAGCGTTTAAAC          | GGCACCTTTATTGCGGCG |
|           | OsOPR04-3                                         | TCGTATGATGATTCCGCATGGCTGCTGCCGTTTCGTAAAGCGTTTAAAC      | GGCACCTTTATTGCGGCG |
|           | SbOPR06-3                                         | TGAAAATTCCGCATAGCCTGCGAGAAATGCGTAAAGCGTTTAAAC          | GGCACCTTTATTGCGGCG |
| Sub. I    | PpOPR1                                            | GGCGACCAACAAAAGCCTGTTCCGATGCGTAAAGCGTTTAAAC            | GGCACCTTTATTGCGGCG |
|           | PpOPR2                                            | GCCGACCAACAAAAGCCTGTTCCGATGCGTAAAGCGTTTAAAC            | GGCACCTTTATTGCGGCG |
|           | PpOPR3                                            | GCCGACCAACAAAAGCCTGTTCCGATGCGTAAAGCGTTTAAAC            | GGCACCTTTATTGCGGCG |
|           | OsOPR04-1                                         | TTTGAAAACCCCGATAGCCTGCTCCGATTTCGTAAAGCGTTTAAAC         | GGCACCTTTATTGCGGCG |
|           | ZmOPR02-1                                         | TTTGAAAACCCCGATAGCCTGCTCCGATTTCGTAAAGCGTTTAAAC         | GGCACCTTTATTGCGGCG |
|           | SbOPR06-2                                         | ACCGAAAACCCCGATAGCCTGCTCCGATTTCGTAAAGCGTTTAAAC         | GGCACCTTTATTGCGGCG |
|           | SbOPR06-1                                         | TTTGAAAACCCCGATAGCCTGCTCCGATTTCGTAAAGCGTTTAAAC         | GGCACCTTTATTGCGGCG |
|           | PtOPR6                                            | TATGAAAACCCCGATAGCCTGCTCCGATTTCGTAAAGCGTTTAAAC         | GGCACCTTTATTGCGGCG |
|           | PtOPR7                                            | TATGAAAACCCCGATAGCCTGCTCCGATTTCGTAAAGCGTTTAAAC         | GGCACCTTTATTGCGGCG |
|           | PtOPR2                                            | CCGAAAATTTAGCGAAAGCCTGCTCCGATTTCGTAAAGCGTTTAAAC        | GGCACCTTTATTGCGGCG |
|           | PtOPR3                                            | ACCAAAATTTAGCGAAAGCCTGCTCCGATTTCGTAAAGCGTTTAAAC        | GGCACCTTTATTGCGGCG |
|           | PtOPR1                                            | TGGAAAGCCCGCATAGCCTGCTCCGATTTCGTAAAGCGTTTAAAC          | GGCACCTTTATTGCGGCG |
|           | AtOPR01-1                                         | TTTGAAATGCCGTGAAAGCCTGACCCGATGCGTAAAGCGTTTAAAC         | GGCACCTTTATTGCGGCG |
|           | AtOPR01-4                                         | CATGCGTGCCTGCATACCTGATGCCGATGCGTAAAGCGTTTAAAC          | GGCACCTTTATTGCGGCG |
|           | AtOPR01-5                                         | CGCGCGTGCAGCCATACCTGATGCCGATGCGTAAAGCGTTTAAAC          | GGCACCTTTATTGCGGCG |
| MtOPR05-2 | ATTGAAAACCCCGATAGCCTGCTCCGATTTCGTAAAGCGTTTAAAC    | GGCACCTTTATTGCGGCG                                     |                    |
| MtOPR05-7 | GTGGAATGCCTGCATAGCCTGGTCCGATGCGTAAAGCGTTTAAAC     | GGCACCTTTATTGCGGCG                                     |                    |
| MtOPR05-1 | ATTGAAAACCCCGATAGCCTGCTCCGATTTCGTAAAGCGTTTAAAC    | GGCACCTTTATTGCGGCG                                     |                    |
| MtOPR05-3 | ACCGAATGCCATATAGCCTGGTCCGATGCGTAAAGCGTTTAAAC      | GGCACCTTTATTGCGGCG                                     |                    |
| MtOPR05-4 | ATTGAAATGCAGCCATAGCCTGGTCCGATGCGTAAAGCGTTTAAAC    | GGCACCTTTATTGCGGCG                                     |                    |
| MtOPR05-5 | ACCGAATGCCGATAGCCTGGTCCGATGCGTAAAGCGTTTAAAC       | GGCACCTTTATTGCGGCG                                     |                    |
| MtOPR05-6 | ACCGAATGCCGATAGCCTGGTCCGATGCGTAAAGCGTTTAAAC       | GGCACCTTTATTGCGGCG                                     |                    |
| Sub. VI   | PpOPR4                                            | AA GAAAAGCGGAAAAGCCTGTGGCCGATGCGTAAAGCGTTTAAAC         | GGCACCTTTATTGCGGCG |
|           | PpOPR5                                            | C AGAGCGAAGAAAAGCCTGTGGCCGATGCGTAAAGCGTTTAAAC          | GGCACCTTTATTGCGGCG |
|           | PpOPR2                                            | ATTGAAAAGCAAACATAGCATTTCGCGGATTCGTAAAGCGTTTAAAC        | GGCACCTTTATTGCGGCG |
|           | PpOPR1                                            | ATTGAAAAGCAAACATAGCATTTCGCGGATTCGTAAAGCGTTTAAAC        | GGCACCTTTATTGCGGCG |
|           | SmOPR1                                            | ACGATGCGCA TACCTGTGGCCGATTCGTAAAGCGTTTAAAC             | GGCACCTTTATTGCGGCG |
|           | SmOPR2                                            | GCGCCGGAAGCGGCGGATTTTCGCGGATTCGTAAAGCGTTTAAAC          | GGCACCTTTATTGCGGCG |
|           | SmOPR3                                            | ACTGGAAA GCGAAC TGTGGCCGCTGAAACGTTTCGTAAAGCGTTTAAAC    | GGCACCTTTATTGCGGCG |
|           | SmOPR4                                            | ACTGGAAA GCGAAC TGTGGCCGCTGCGTTCGTAAAGCGTTTAAAC        | GGCACCTTTATTGCGGCG |
|           | SmOPR6                                            | ACTGGAAA GCGAAC TGTGGCCGCTGCGTTCGTAAAGCGTTTAAAC        | GGCACCTTTATTGCGGCG |
|           | PpOPR3                                            | ACCCAGCTGAACTGCAAAAATTTTTCGTATCAG TATGAA               | GGCACCTTTATTGCGGCG |
| Sub. II   | SmOPR5                                            | CTGGGCTTTCTGCGTGA GCGACCAAGCGGCGAGCAGC                 | GGCACCTTTATTGCGGCG |
|           | PpOPR6                                            | AAATGGGCG CCGAGTATGCGCATGACCAAAACGTTTCGTAAAC           | GGCACCTTTATTGCGGCG |
|           | PtOPR4                                            | CGAAGATGTGGTGGCGCAGACCACCCGTACCTGGCGTTCGTAAAGCGTTTAAAC | GGCACCTTTATTGCGGCG |
|           | PtOPR5                                            | CGAAGATGAAGAAGCGCAGATGATTTCGTAAAGCGTTTAAAC             | GGCACCTTTATTGCGGCG |
|           | AtOPR02-1                                         | CGATGAAAGAAGAAAGCGAAACTGATGAAAAGCCTGCGTATGCGTAAAC      | GGCACCTTTATTGCGGCG |
|           | OsOPR08-1                                         | CGCGGAAAGAAGAAAGCGCTCTGATGCGTACCTGCGTGGCACCTATCAG      | GGCACCTTTATTGCGGCG |
|           | ZmOPR01-1                                         | CGCGGAAAGAAGAAAGCGCTCTGATGCGTACCTGCGTGGCACCTATCAG      | GGCACCTTTATTGCGGCG |
| SbOPR07-1 | CGCGGAAAGAAGAAAGCGCTCTGATGCGTACCTGCGTGGCACCTATCAG | GGCACCTTTATTGCGGCG                                     |                    |
| ZmOPR04-1 | CGCGGAAAGAAGAAAGCGCTCTGATGCGTACCTGCGTGGCACCTATCAG | GGCACCTTTATTGCGGCG                                     |                    |
| Sub. VII  | VcOPR1                                            | GAAAAG AGCAGCGATAGCCTGAAACCGTTTCGTAAAGCGTTTAAAC        | GGCACCTTTATTGCGGCG |
|           | CrOPR2                                            | GAATGCGCGACCGTGGATAACCTGGCGCCGTTTCGTAAAGCGTTTAAAC      | GGCACCTTTATTGCGGCG |
|           | CrOPR3                                            | GAACGTCGCAACCGAAACCGTCTGCCGTTTCGTAAAGCGTTTAAAC         | GGCACCTTTATTGCGGCG |
|           | CrOPR1                                            | CGGAACATTAATTTGATCCGTTTCGTAAAGCGTTTAAAC                | GGCACCTTTATTGCGGCG |
|           | VcOPR2                                            | CGGAACATTAATTTGATCCGTTTCGTAAAGCGTTTAAAC                | GGCACCTTTATTGCGGCG |



1270 1280 1290 1300 1310 1320 1330

|          |           |                                                   |                                              |              |            |           |
|----------|-----------|---------------------------------------------------|----------------------------------------------|--------------|------------|-----------|
|          | ZmOPR08-1 | TGGCGTATGGCAA                                     | CTGTTTCTGGCGAACCCGGATCTGCCCGT                | CGTTTTGA     | AC         | TGGATGTG  |
|          | ZmOPR09-1 | TGGCGTATGGCCGTCTGTTTCTGGCGAACCCGGATCTGCCCGT       | CGTTTTGA                                     | AC           | TGGATGTG   |           |
|          | SbOPR10-2 | TGAGCTATGGCCGTCTGTTTCTGGCGAACCCGGATCTGCCCGT       | CGTTTTGA                                     | AC           | TGGGCAGC   |           |
|          | SbOPR10-1 | TGGCGTATGGCCGTCTGTTTCTGGCGAACCCGGATCTGCCCGT       | CGTTTTGA                                     | AC           | TGGGCAGC   |           |
|          | SbOPR10-4 | TGGCGTATGGCCGTCTGTTTCTGGCGAACCCGGATCTGCCCGT       | CGTTTTGA                                     | AC           | TGAAACCGC  |           |
|          | SbOPR10-5 | TGGCGTATGGCCGTCTGTTTCTGGCGAACCCGGATCTGCCCGT       | CGTTTTGA                                     | AC           | TGAAACCGC  |           |
| Sub. III | ZmOPR06-1 | TGGCGTATGGCCGTCTGTTTCTGGCGAACCCGGATCTGCCCGT       | CGTTTTGA                                     | AG           | TGGATGAA   |           |
|          | SbOPR10-3 | TGGCGTATGGCCGTCTGTTTCTGGCGAACCCGGATCTGCCCGT       | CGTTTTGA                                     | AC           | TGGATGCG   |           |
|          | OsOPR06-1 | TGGCGTATGGCCGTCTGTTTCTGGCGAACCCGGATCTGCCCGT       | CGTTTTGA                                     | AC           | TGGATGCG   |           |
|          | OsOPR06-2 | TGAGCTATGGCCGTCTGTTTCTGGCGAACCCGGATCTGCCCGT       | CGTTTTGA                                     | AC           | TGGATGCG   |           |
|          | OsOPR06-4 | TGGCGTATGGCCGTCTGTTTCTGGCGAACCCGGATCTGCCCGT       | CGTTTTGA                                     | AC           | TGAAACCGC  |           |
|          | OsOPR06-3 | TGGCGTATGGCCGTCTGTTTCTGGCGAACCCGGATCTGCCCGT       | CGTTTTGC                                     | GA           | TTAACCGC   |           |
|          | OsOPR06-5 | TGGCGTATGGCCGTCTGTTTCTGGCGAACCCGGATCTGCCCGT       | CGTTTTGA                                     | AC           | TGGATGCG   |           |
|          | OsOPR06-6 | TGGCGTATGGCCGTCTGTTTCTGGCGAACCCGGATCTGCCCGT       | CGTTTTGA                                     | AC           | TGGATGCG   |           |
| Sub. IV  | ZmOPR08-2 | TGGCGTATGGCCGTCTGTTTCTGGCGAACCCGGATCTGCCCGT       | CGTTTTCGTCTGC                                |              | CGGATGCG   |           |
|          | SbOPR09-1 | TGAGCTATGGCCGTCTGTTTCTGGCGAACCCGGATCTGCCCGT       | CGTTTTCGTCTGC                                |              | CGGATGCGGA |           |
|          | OsOPR01-1 | TGGCGTATGGCCGTCTGTTTCTGGCGAACCCGGATCTGCCCGT       | CGTTTTCG                                     | TC           | GTAAAGCG   |           |
|          | OsOPR01-2 | CGTGGTGGCTGAAATTTGCGCGGCAGCCGCTCCGGCGGGCGAAGTGCAG |                                              | GC           | GGAAAGCG   |           |
|          | ZmOPR03-1 | TGGCGTATGGCCGTCTGTTTCTGGCGAACCCGGATCTGCCCGT       | CGTTTTGC                                     | GA           | AAAAAGCG   |           |
|          | SbOPR08-1 | TGGCGTATGGCCGTCTGTTTCTGGCGAACCCGGATCTGCCCGT       | CGTTTTGC                                     | GA           | AAAAAGCG   |           |
| Sub. V   | OsOPR02-1 | TGGCGTATGGCAA                                     | TGTTTCTGGCGAACCCGGATCTGCCCGT                 | CGTTTTGA     | AC         | TGAAACCGC |
|          | SbOPR04-1 | TGGCGTATGGCAA                                     | TGTTTCTGGCGAACCCGGATCTGCCCGT                 | CGTTTTGA     | AC         | TGAAACCGC |
|          | OsOPR04-2 | TGGTGTATGGCCGTCTGTTTCTGGCGAACCCGGATCTGCCCGT       | CGTTTTCG                                     | TC           | TGGGCAGC   |           |
|          | OsOPR04-3 | TGGTGTATGGCCGTCTGTTTCTGGCGAACCCGGATCTGCCCGT       | CGTTTTCA                                     | GC           | TGGATGCG   |           |
|          | SbOPR06-3 | TGGTGTATGGCCGTCTGTTTCTGGCGAACCCGGATCTGCCCGT       | CGTTTTCA                                     | GC           | TGAAACCGC  |           |
| Sub. I   | PsoPR1    | TGGTGTATGGCCGTCTGTTTCTGGCGAACCCGGATCTGCCCGT       | CGTTTTGA                                     | AC           | TGAAACCGC  |           |
|          | PsoPR2    | TGGTGTATGGCCGTCTGTTTCTGGCGAACCCGGATCTGCCCGT       | CGTTTTGA                                     | AC           | TGAAACCGC  |           |
|          | PsoPR3    | TGGTGTATGGCCGTCTGTTTCTGGCGAACCCGGATCTGCCCGT       | CGTTTTGA                                     | AC           | TGAAACCGC  |           |
|          | OsOPR04-1 | TGGCGTATGGCCGTCTGTTTCTGAGCAACCCGGATCTGCCCGT       | CGTTTTGA                                     | AA           | TTGATGCG   |           |
|          | ZmOPR02-1 | TGGCGTATGGCCGTCTGTTTCTGGCGAACCCGGATCTGCCCGT       | CGTTTTGA                                     | AG           | TGGATGCG   |           |
|          | SbOPR06-2 | TGGCGTATGGCCGTCTGTTTCTGAGCAACCCGGATCTGCCCGT       | CGTTTTGG                                     | CC           | TGGATGCG   |           |
|          | SbOPR06-1 | TGGCGTATGGCCGTCTGTTTCTGAGCAACCCGGATCTGCCCGT       | CGTTTTGA                                     | AA           | TTGATGCG   |           |
|          | PtOPR6    | TGGCGTATGGCCGTCTGTTTCTGGCGAACCCGGATCTGCCCGT       | CGTTTTGA                                     | AC           | TGAAACCGC  |           |
|          | PtOPR7    | TGGCGTATGGCCGTCTGTTTCTGGCGAACCCGGATCTGCCCGT       | CGTTTTGA                                     | AC           | TGAAACCGC  |           |
|          | PtOPR2    | TGGCGTATGGCCGTCTGTTTCTGGCGAACCCGGATCTGCCCGT       | CGTTTTGA                                     | AC           | TGATGCG    |           |
|          | PtOPR3    | TGGCGTATGGCCGTCTGTTTCTGGCGAACCCGGATCTGCCCGT       | CGTTTTGA                                     | AC           | TGATGCG    |           |
|          | PtOPR1    | TGGCGTATGGCCGTCTGTTTCTGGCGAACCCGGATCTGCCCGT       | CGTTTTGA                                     | AC           | TGGATGCG   |           |
|          | AtOPR01-1 | TGGCGTATGGCCGTCTGTTTCTGGCGAACCCGGATCTGCCCGT       | CGTTTTGA                                     | AC           | TGAAACCGC  |           |
|          | AtOPR01-4 | TGGCGTATGGCCGTCTGTTTCTGGCGAACCCGGATCTGCCCGT       | CGTTTTCA                                     | GG           | TGGATGCG   |           |
|          | AtOPR01-5 | TGGCGTATGGCCGTCTGTTTCTGGCGAACCCGGATCTGCCCGT       | CGTTTTCA                                     | GC           | TGGATGCG   |           |
|          | MtOPR05-2 | TGGTGTATGGCCGTCTGTTTCTGGCGAACCCGGATCTGCCCGT       | CGTTTTGC                                     | GC           | TGAAACCGC  |           |
|          | MtOPR05-7 | TGGCGTATGGCCGTCTGTTTATTAGCAACCCGGATCTGCCCGT       | CGTTTTGC                                     | GC           | TGGATGCG   |           |
|          | MtOPR05-1 | TGGTGTATGGCCGTCTGTTTCTGGCGAACCCGGATCTGCCCGT       | CGTTTTGC                                     | GC           | TGAAACCGC  |           |
|          | MtOPR05-3 | TGGCGTATGGCCGTCTGTTTATTAGCAACCCGGATCTGCCCGT       | CGTTTTGC                                     | GC           | TGAAACCGC  |           |
|          | MtOPR05-4 | TGGTGTATGGCCGTCTGTTTCTGGCGAACCCGGATCTGCCCGT       | CGTTTTGC                                     | GC           | TGAAACCGC  |           |
|          | MtOPR05-5 | TGGTGTATGGCCGTCTGTTTCTGGCGAACCCGGATCTGCCCGT       | CGTTTTGC                                     | GC           | TGGATGCG   |           |
|          | MtOPR05-6 | TGGTGTATGGCCGTCTGTTTCTGGCGAACCCGGATCTGCCCGT       | CGTTTTGC                                     | GC           | TGGATGCG   |           |
| Sub. VI  | PpOPR4    | TGGTGTATGGCCGTCTGTTTCTGGCGAACCCGGATCTGGTGAAC      | CGTTTTGC                                     | GC           | TGAAACCGC  |           |
|          | PpOPR5    | TGGTGTATGGCCGTCTGTTTCTGGCGAACCCGGATCTGGTGAAC      | CGTTTTGC                                     | GC           | TGAAACCGC  |           |
|          | PpOPR2    | TGGCGTATGGCCGTCTGTTTCTGGCGAACCCGGATCTGCCCGT       | CGTTTTAG                                     | CG           | TGATGCG    |           |
|          | PpOPR1    | TGGCGTATGGCCGTCTGTTTCTGGCGAACCCGGATCTGCCCGT       | CGTTTTAG                                     | GA           | GCTGCGC    |           |
|          | SmOPR1    | TGGTGTATGGCCGTCTGTTTCTGGCGAACCCGGATCTGGTGAAC      | CGTTTTAA                                     | AC           | TGAAACCGC  |           |
|          | SmOPR2    | TGGTGTATGGCCGTCTGTTTCTGGCGAACCCGGATCTGGTGAAC      | CGTTTTGA                                     | AC           | TGAAACCGC  |           |
|          | SmOPR3    | TGGTGTATGGCCGTCTGTTTCTGGCGAACCCGGATCTGGTGAAC      | CGTTTTCA                                     | GC           | TGAAACCGC  |           |
|          | SmOPR4    | TGGTGTATGGCCGTCTGTTTCTGGCGAACCCGGATCTGGTGAAC      | CGTTTTCA                                     | GC           | TGAAACCGC  |           |
|          | SmOPR6    | TGGTGTATGGCCGTCTGTTTCTGGCGAACCCGGATCTGGTGAAC      | CGTTTTCA                                     | GC           | TGAAACCGC  |           |
|          |           | PpOPR3                                            | TGAGCTATGGCCGTCTGTTTCTGGCGAACCCGGATCTGGTGAAC | CGTTTTAATTTT |            | GATCTG    |
|          | SmOPR5    | TGGCGTATGGCCGTCTGTTTATTAGCAACCCGGATCTGCCCGT       | CGTTTTGCGGATG                                |              | TGGATGCG   |           |
|          | PpOPR6    | TGGCGTATGGCCGTACTTTATTGCGAACCCGGATCTGGTGAAC       | CGTTTTGCGGAA                                 |              | GATGCG     |           |
| Sub. II  | PtOPR4    | TGAGCTATGGCCGTGATTTTATTAGCAACCCGGATCTGGTGC        | CTGCTGAA                                     | AC           | TGAAACCGC  |           |
|          | PtOPR5    | TGAGCTATGGCCGTCTGTTTATTAGCAACCCGGATCTGGTGC        | CTGCTGAA                                     | AC           | TGAAACCGC  |           |
|          | AtOPR02-1 | TGAGCTATGGCCGTCTGTTTATTGCGAACCCGGATCTGGTGC        | AGCCGTTTTAA                                  | AA           | TTGATGCG   |           |
|          | OsOPR08-1 | TGAGCTATGGCCGTCTGTTTATTAGCAACCCGGATCTGGTGC        | GAAACGTTTTCG                                 | TC           | TGAAACCGC  |           |
|          | ZmOPR01-1 | TGAGCTATGGCCGTCTGTTTATTGCGAACCCGGATCTGGTGC        | GAAACGTTTTCG                                 | TC           | GTGATGCG   |           |
|          | SbOPR07-1 | TGAGCTATGGCCGTCTGTTTATTGCGAACCCGGATCTGGTGC        | GAAACGTTTTCG                                 | TC           | GTGATGCG   |           |
|          | ZmOPR04-1 | TGAGCTATGGCCGTCTGTTTATTGCGAACCCGGATCTGGTGC        | GAAACGTTTTCG                                 | TC           | GTGATGCG   |           |
| Sub. VII | VcOPR1    | TGGCGTATGGCCGTGGTATCTGGCGAACCCGGATCTGCATA         | AACGTTTTCT                                   | GC           | TGAAACCGC  |           |
|          | CrOPR2    | TGGCGTATGGCCGTGGTATCTGGCGAACCCGGATTTTCATA         | AACGTTTTCT                                   | GC           | TGGGCAGC   |           |
|          | CrOPR3    | TGGCGTATGGCCGTGGTATCTGGCGAACCCGGATTTTCATA         | AACGTTTTCT                                   | GC           | TGGGCAGC   |           |
|          | CrOPR1    | TGGCGTATGGCCGTGGTATCTGGCGAACCCGGATTTTCATA         | AACGTTTTCT                                   | GC           | TGGGCAGC   |           |
|          | VcOPR2    | TGCTGTATGGCGTGCATTTTATTGCGAACCCGGATCTGCCG         | AACTGGTGGCGGGCGCTGAAACCGC                    |              |            |           |

1340 1350 1360 1370 1380 1390 1400

|           |           |      |                                  |                                   |               |          |
|-----------|-----------|------|----------------------------------|-----------------------------------|---------------|----------|
|           | ZmOPR08-1 | ...  | GCG                              | CTGAACAAATATGATCGTAGCACCTTTTATA   | CCAGGATCCGA   | TTGTGGGC |
|           | ZmOPR09-1 | ---  | GCG                              | CTGAACAAATATGATCGTAGCACCTTTTATA   | CCAGGATCCGA   | TTGTGGGC |
|           | SbOPR10-2 | ---  | AGC                              | CTGAACAAATATGATCGTAGCACCTTTTATA   | CCAGGATCCGG   | TGGTGGGC |
|           | SbOPR10-1 | ---  | CCG                              | CTGAACAAATATGATCGTAGCACCTTTTATA   | CCAGGATCCGG   | TGGTGGGC |
|           | SbOPR10-4 | ---  | CCG                              | CTGAACAAATATGATCGTAGCACCTTTTATA   | CCAGGATCCGG   | TGGTGGGC |
|           | SbOPR10-5 | ---  | CCG                              | CTGAACAAATATGATCGTAGCACCTTTTATA   | CCAGGATCCGG   | TGGTGGGC |
| Sub. III  | ZmOPR06-1 | ---  | ATT                              | CTGAACAAATATGATCGTAGCACCTTTTATA   | CCAGGATCCGG   | TGGTGGGC |
|           | SbOPR10-3 | ---  | ACC                              | CTGAACAAATATGATCGTAGCACCTTTTATA   | CCAGGATCCGG   | TGATGGGC |
|           | OsOPR06-1 | ---  | CCG                              | ATGAACAAATATGATCGTAACACCTTTTATA   | CCAGGATCCGG   | TGGTGGGC |
|           | OsOPR06-2 | ---  | CCG                              | CTGAACAAATATGATCGTAACACCTTTTATA   | CCAGGATCCGA   | TGTGGGC  |
|           | OsOPR06-4 | ---  | CCG                              | CTGAACAAATATGATGGCAGCACCTTTTATA   | CCCATGATCCGG  | TGGTGGGC |
|           | OsOPR06-3 | ---  | CCG                              | CTGAACAAATATAACCGTAGCACCTTTTATA   | TTAGGATCCGG   | TGGTGGGC |
|           | OsOPR06-5 | ---  | CCG                              | CTGAACCGTTATGATCGTAGCACCTTTTATA   | CCAGGATCCGG   | TGGTGGGC |
|           | OsOPR06-6 | ---  | CCG                              | CTGAACCGTTATGATCGTAGCACCTTTTATA   | CCAGGATCCGG   | TGGTGGGC |
| Sub. IV   | ZmOPR08-2 | ---  | CCG                              | CTGAACAAATATGATCGTACCACCTTTTATA   | CCAGGATCCGG   | TGATGGGC |
|           | SbOPR09-1 | TCCG | CCG                              | CTGAACAAATATGATCGTAAACCTTTTATA    | CCAGGATCCGG   | TGGTGGGC |
|           | OsOPR01-1 | ---  | GGC                              | CTGAACAAATATGATCGTAGCACCTTTTATA   | CCAGGATCCGG   | TGGTGGGC |
|           | OsOPR01-2 | ---  | GCA                              | GCGAACGTCTGTGA                    |               |          |
|           | ZmOPR03-1 | ---  | CCG                              | CTGAACAAATATGATCGTAGCACCTTTTATA   | CCAGGATCCGG   | TGGTGGGC |
|           | SbOPR08-1 | ---  | GCG                              | CTGAACAAATATGATCGTAGCACCTTTTATA   | CCAGGATCCGG   | TGGTGGGC |
| Sub. V    | OsOPR02-1 | ---  | CCG                              | CTGAACAAATATGATCGTAGCACCTTTTATA   | CCAGGATCCGG   | TGATGGGC |
|           | SbOPR04-1 | ---  | CCG                              | CTGAACAAATATGATCGTAGCACCTTTTATA   | CCCGGATCCGG   | TGGTGGGC |
|           | OsOPR04-2 | ---  | CCG                              | CTGAACGGCTATGATCGTGGCACCTTTTATA   | CCCGGATCCGG   | TGGGGGC  |
|           | OsOPR04-3 | ---  | CCG                              | CTGAACAAATATGATCGTGGCACCTTTTATA   | CCCATGATCCGG  | TGGTGGGC |
|           | SbOPR06-3 | ---  | CCG                              | CTGAACAAATATGATCGTAGCACCTTTTATA   | CCGATGATCCGG  | TGGTGGGC |
| Sub. I    | PsoPR1    | ---  | CCG                              | CTGAACAAATATGATCGTAAACACCTTTTATA  | CCCGGATCCGG   | TGGTGGGC |
|           | PsoPR2    | ---  | CCG                              | CTGAACAAATATGATCGTAAACACCTTTTATA  | CCCGGATCCGG   | TGGTGGGC |
|           | PsoPR3    | ---  | AGC                              | CTGAACAAATATGATCGTAAACACCTTTTATA  | TTCCGGATCCGG  | TGGTGGGC |
|           | OsOPR04-1 | ---  | CCG                              | CTGAACAAATATAAACCGTGAAACCTTTTATA  | TTAGCGATCCGG  | TGATGGGC |
|           | ZmOPR02-1 | ---  | CCG                              | CTGAACAAATATAAACCGTGATACCTTTTATA  | TTCCGGATCCGG  | TGGTGGGC |
|           | SbOPR06-2 | ---  | CCG                              | CTGAACAAATATAAACCGTAGCACCTTTTATA  | CCCGGATCCGG   | TGATGGGC |
|           | SbOPR06-1 | ---  | ACC                              | CTGAACAAATATAAACCGGAAACCTTTTATA   | CCCGGATCCGG   | TGATGGGC |
|           | PtOPR6    | ---  | CCG                              | CTGAACCGTTATAAACCGTAAACACCTTTTATA | TTCCGGATCCGG  | TGGTGGGC |
|           | PtOPR7    | ---  | CCG                              | CTGAACCGTTATAAACCGTAAACACCTTTTATA | TTCCGGATCCGG  | TGGTGGGC |
|           | PtOPR2    | ---  | CCG                              | CTGAACAAATATAAACCGTGAAACCTTTTATA  | CCCATGATCCGG  | TGGTGGGC |
|           | PtOPR3    | ---  | CCG                              | CTGAACAAATATAAACCGTGAAACCTTTTATA  | CCCATGATCCGG  | TGGTGGGC |
|           | PtOPR1    | ---  | CCG                              | CTGAACAAATATGATCGTGGCACCTTTTATA   | CCCGGATCCGG   | TGATGGGC |
|           | AtOPR01-1 | ---  | CCG                              | CTGAACAAATAA                      |               |          |
|           | AtOPR01-4 | ---  | CCG                              | CTGAACAAATATGATCGTCCGACCTTTTATA   | CCAGGATCCGG   | TGGTGGGC |
|           | AtOPR01-5 | ---  | CCG                              | CTGAACAAATATAAACCGTAGCACCTTTTATA  | CCAGGATCCGG   | TGGTGGGC |
| MtOPR05-2 | ---       | CCG  | CTGAACAAATATAAACCGTGAAACCTTTTATA | TTAGCGATCCGG                      | TGGTGGGC      |          |
| MtOPR05-7 | ---       | CCG  | CTGAACAAATATAAACCGTGAAACCTTTTATA | CCAGGATCCGG                       | TGGTGGGC      |          |
| MtOPR05-1 | ---       | CCG  | CTGAACAAATATAAACCGTGAAACCTTTTATA | CCAGGATCCGG                       | TGGTGGGC      |          |
| MtOPR05-3 | ---       | CCG  | CTGAACAAATATAAACCGTGAAACCTTTTATA | CCAGGATCCGG                       | TGATGGGC      |          |
| MtOPR05-4 | ---       | CCG  | CTGAACAAATATAAACCGTGGCACCTTTTATA | CCAGGATCCGG                       | TGATGGGC      |          |
| MtOPR05-5 | ---       | CCG  | CTGAACAAATATAAACCGTGAAACCTTTTATA | TTAGCGATCCGG                      | TGGTGGGC      |          |
| MtOPR05-6 | ---       | CCG  | CTGAACAAATATAAACCGTGAAACCTTTTATA | GTGAGCGATCCGG                     | TGGTGGGC      |          |
| PpOPR4    | ---       | CCG  | CTGAACGATTATAAACCGTGATACCTTTTATA | CCAGGATCCGG                       | TGGTGGGC      |          |
| PpOPR5    | ---       | CCG  | CTGAACAAATATGATCGTAGCACCTTTTATA  | CCAGGATCCGG                       | TGGTGGGC      |          |
| PpOPR2    | ---       | CCG  | CTGAACCACTATGATCGTAGCACCTTTTATA  | TTAGGATCCGG                       | TGGTGGGC      |          |
| PpOPR1    | ---       | CCG  | CTGAACAAATATGATCGTAGCACCTTTTATA  | CCAGGATCCGG                       | TGGTGGGC      |          |
| SmOPR1    | ---       | CCG  | CTGAACAAATATGATCGTCCGACCTTTTATA  | TTAGGATCCGG                       | TGGTGGGC      |          |
| SmOPR2    | ---       | GCG  | CTGAACGTCTATGATCGTACACCTTTTATA   | CCCGGATCCGG                       | TGGTGGGC      |          |
| SmOPR3    | ---       | CCG  | CTGAACCTGTATGATCGTAAACACCTTTTATA | CCATGATCCGG                       | TGGGGGC       |          |
| SmOPR4    | ---       | CCG  | CTGAACCTGTATGATCGTAAACACCTTTTATA | CCATGATCCGG                       | TGGGGGC       |          |
| SmOPR6    | ---       | CCG  | CTGAACCTGTATGATCGTAAACACCTTTTATA | CCATGATCCGG                       | TGGGGGC       |          |
| Sub. VI   | PpOPR3    | ---  | GAA                              | CTGAACGAATATGATCGTAGCACCTTTTATA   | CCCATGATCCG   | AAA      |
|           | SmOPR5    | ---  | CAG                              | CTGAACCCGTATAAACCGTGGCACCTTTTATA  | CCCATGATCCGG  | TGGTGGGC |
|           | PpOPR6    | ---  | CAG                              | CTGAACAACCTGAAACAGCAGCACCTTTTATA  | GGCGATTATACCG | CCCTGGGC |
|           | PtOPR4    | ---  | CCG                              | CTGAACAAATATATTCGTGAAACCTTTTATA   | CCCATGATCCGA  | TTGTGGGC |
|           | PtOPR5    | ---  | CCG                              | CTGAACAAATATATTCGTGAAACCTTTTATA   | CCCATGATCCGG  | TGGTGGGC |
|           | AtOPR02-1 | ---  | GAA                              | CTGAACAAATATAAACCGTAAACCTTTTATA   | CCCATGATCCGG  | TGGTGGGC |
| Sub. II   | OsOPR08-1 | ---  | GGC                              | CTGAACAAATATGTGCGTAAACCTTTTATA    | CCCGGATCCGG   | TGGTGGGC |
|           | ZmOPR01-1 | ---  | CCG                              | CTGAACAAATATGTGCGTAAACCTTTTATA    | CCCGGATCCGG   | TGGTGGGC |
|           | SbOPR07-1 | ---  | CCG                              | CTGAACAAATATGTGCGTAAACCTTTTATA    | CCCGGATCCGG   | TGGTGGGC |
|           | ZmOPR04-1 | ---  | CCG                              | CTGAACCGTTATGTGCGTAAACCTTTTATA    | CCCGGATCCGG   | TGGTGGGC |
|           | VcOPR1    | ---  | CCG                              | CTGAACAAATATGATCGTAAACCTTTTATA    | GCCGGGCA      | TGGAAGGC |
| Sub. VII  | CrOPR2    | ---  | CCG                              | CTGAACCCGTATAAACCGTGATACCTTTTATA  | GGGGGGCC      | TGGAAGGC |
|           | CrOPR3    | ---  | CCG                              | CTGAACCCGTATAAACCGTGATACCTTTTATA  | GGGGGGCC      | TGCAAGGC |
|           | CrOPR1    | ---  | CCG                              | CTGAACCCGTATAAACCGTGATACCTTTTATA  | GGGGGGCC      | TGCAAGGC |
|           | VcOPR2    | GGG  | CCG                              | CTGAACCCGTATAAACCGTGATACCTTTTATA  | GGGGGGCC      | TGCAAGGC |

1410 1420 1430 1440 1450 1460 1470

Sub. III  
ZmOPR08-1 TATACCGATTATCCGTTTCTTGAACA GGAA GATGGCAAAAACGAA GAATGA  
ZmOPR09-1 TATACCGATTATCCGTTTCTTGA GAA GATGGCAAAAACGAA GAAAGCGTGTGA  
SbOPR10-2 TATACCGATTATCCGAGCCTGGAT GATGATAAAAACGATCG GACCCGCGATGATGCGTAG  
SbOPR10-1 TATACCGATTATCCGTTTCTAT GAAGATAACAACCATGTGTGA  
SbOPR10-4 TATACCGATTATCCGTTTCTGGGAAGA TGGCAGCAACAACCATGATAGCACCACCCAGGCGTAA  
SbOPR10-5 TATACCGATTATCCGTTTCTGGGAAGA TAACTGCGATAACGATGAAAAGCAGCAACCAAGCGTAA  
ZmOPR06-1 TATACCGATTATCCGTTTCTGCGTGA TGATAGCGAAGATC TGGCGGCGCAGGTCTAA  
SbOPR10-3 TATACCGATTATCCGTTTCTGAGCGA TGATAGCAAGATC TGGCGGCGCAGGATTAA  
OsOPR06-1 TATACCGATTATCCGTTTCTGGATGAACATCATCATGATGATGATGATGATAGCAACCGCGGAGCGCGT  
OsOPR06-2 TATACCGATTATCCGTTTCTGGATGAAGATCAGAAACAACGCG TGGCGGATGCGTAG  
OsOPR06-4 TATACCGATTATCCGTTTCTGGAAAGAAAAAAAAGAGATAGCGGACCGTGATTCTGTGA  
OsOPR06-3 TATACCGATTATCCGTTTCTGGATGAAAAAGATGAAG GCGCGCGACCTATGCGTAA  
OsOPR06-5 TATACCGATTATCCGTTTCTGGAAAGAAATGATGAAGAAAGCACCACACCTATGCGTAA  
OsOPR06-6 TATACCGATTATCCGTTTCTGGAAAGAAATGATGAAGAAAGCGTACCACCTATGCGTAA  
Sub. IV  
ZmOPR08-2 TATACCGATTATCCGTTTCTGGCGGATGCGGATG CCGATAAAATAA  
SbOPR09-1 TATACCGATTATCCGTTTCTGCATGATGATGATGCGCGGATAAAATAA  
OsOPR01-1 TATACCGATTATCCGTTTCTGGATGATCAGAACAGCGAACTGCGAGCCCGTTGA  
OsOPR01-2  
ZmOPR03-1 TATACCGATTATCCGTTTCTGGATCAGCTGTAG  
SbOPR08-1 TATACCGATTATCCGTTTCTGGATCAGTTTLAG  
Sub. V  
OsOPR02-1 TATACCGATTATCCGTTTCTGAGCC CGCTGTGA  
SbOPR04-1 TATACCGATTATCCGTTTCTTAGCC CGAGCGTGTGA  
OsOPR04-2 TATACCGATTATCCGTTTCTGGATGATGATGCGGATGATGGCCTGGCGGCGAGCGCGGCGAGCGAGCA  
OsOPR04-3 TATACCGATTATCCGTTTCTGGATGATGATCGTGA AGCGATGACCGATCATAACCGCGTGA  
SbOPR06-3 TATACCGATTATCCGTTTCTGGAAAAA GCGA ACCGCTGAACAGCCTGACCCCTCGTGGCGGCAT  
Sub. I  
PsOPR1 TATACCGATTATCCGTTTCTGGAAATGA  
PsOPR2 TATACCGATTATCCGTTTCTGGAAATGA  
PsOPR3 TATACCGATTATCCGTTTCTGGAAATGA  
OsOPR04-1 TATACCGATTATCCGTTTCTGCGGAGCGATGTGTAA  
ZmOPR02-1 TATACCGATTATCCGTTTCTGAGCAGCGATGTGTAA  
SbOPR06-2 TATACCGATTATCCGTTTCTGGAACCGGAACCGTAA  
SbOPR06-1 TATACCGATTATCCGTTTCTGCGGAGCGATGTGTAA  
PtOPR6 TATACCGATTATCCGTTTCTGGATGTGCTGCGGTAA  
PtOPR7 TATACCGATTATCCGTTTCTGGATGTGCTGCGGTAA  
PtOPR2 TATACCGATTATCCGTTTCTGGAAAGATACCGCGTAG  
PtOPR3 TATACCGATTATCCGTTTCTGGAAAGATACCGCGTAG  
PtOPR1 TATACCGATTATCCGTTTCTGGAAAGCACCGCGTAA  
Sub. VI  
AtOPR01-1  
AtOPR01-4 TATACCGATTATCCGTTTCTGGAAAGCACCGCGTAA  
AtOPR01-5 TATACCGATTATCCGAGCCTGGAAAGCACCGCGTAA  
MtOPR05-2 TATACCGATTATCCGTTTCTGGAAATGA  
MtOPR05-7 TATACCGATTATCCGTTTCTGGGCTAA  
MtOPR05-1 TATACCGATTATCCGTTTCTGGAAATGA  
MtOPR05-3 TATACCGATTATCCGAGCCTGGAAATAA  
MtOPR05-4 TATACCGATTATCCGTTTCTGGAAATGA  
MtOPR05-5 TATACCGATTATCCGTTTCTGGAAATGA  
MtOPR05-6 TATACCGATTATCCGTTTCTGGAAATGA  
PpOPR4 TATACCGATTATCCGTTTCTGGAAAGATGTGAAAAGCCAGCGTCTGATGCGACCAAAATATAACCCGCTGA  
PpOPR5 TATACCGATTATCCGTTTCTGGGCGAAGTGCT GCAGGCGTGA  
PpOPR2 TATACCGATTATCCGTTTCTGGAAAGAAAGTGCC GCCGAAAAGCGAAAAATAA  
PpOPR1 TATACCGATTATCCGTTTCTGGATGAAAACCGCGTGCCAGGCGTGA  
SmOPR1 TATACCGATTATCCGTTTCTGGAAAGATTAA  
SmOPR2 TATACCGATTATAGCTTTCTGGAAAGTGAAGCT GCGGCGTGA  
SmOPR3 TATACCGATTATCCGTTTCTGGAAAGAA ACC GTGTAA  
SmOPR4 TATACCGATTATCCGTTTCTGGAAAGAA AGC ACCGCGTAA  
SmOPR6 TATACCGATTATCCGTTTCTGGAAAGAA AGC ACCGCGTAA  
Sub. II  
PpOPR3 TATACCAACATTTGCTGAGCAATTAA  
SmOPR5 TATATGATTATCCGTGCATGGATAGCCGTAA GAAGAGAA GAA GAA GAAGAA GAA GATCGTAAAAAAC  
PpOPR6 TATACCGATTATCCGTTTCTGGATGAAGAAAGCGGATGCGGGCATTTGAACCGTAA  
PtOPR4 TATACCGATTATCCGTTTCTGAGCAAGCGAGCGGCTGA  
PtOPR5 TATACCGATTATCCGTTTCTGAGCAAGCGAAGCGGCTGCAGCTGCGCTGAGCCGCTCTGTGA  
AtOPR02-1 TATACCGATTATCCGTTTCTGGCGCGCTTTAGCCGCTCTGTGA  
OsOPR08-1 TATACCGATTATCCGTTTCTGGGCCAGCCGAA AAGCCGTATGTAA  
ZmOPR01-1 TATACCGATTATACCTTTCTGGGCCAGCCGAA AGCGGTATGTGA  
SbOPR07-1 TATACCGATTATCCGTTTCTGGGCCAGCCGAA AGCGGTATGTGA  
ZmOPR04-1 TATACCGATTATCCGTTTCTGGGCCAGCCGAA AGCGGTATGTGA  
Sub. VII  
VcOPR1 TATATGATTATCCGACCTGGAAAGACTGCAGGGCCAGGGCGAAGATGCGAAACAGTAG  
CrOPR2 TATACCGATTATCCGACCTGGAAAGACTGCAGGGCCAGGGCGAAGATGCGAAACAGTAG  
CrOPR3 TATATGATTATCCGACCTGGAAAGACTGCAGGGCCAGGGCGAAGATGCGAAACAGTAG  
CrOPR1 TTTACCGATTGGCCCGTGTGGATCCGGCGACCATTAAGCGTGA  
VcOPR2 TTTACCGATTGGCCCGTGTGGATCCGGCGACCATTAAGCGTGA

1480 1490 1500 1510

.....|.....|.....|.....|.....|.....|.....|.....|.....

Sub. III

- ZmOPR08-1
- ZmOPR09-1
- SbOPR10-2
- SbOPR10-1
- SbOPR10-4
- SbOPR10-5
- ZmOPR06-1
- SbOPR10-3
- OsOPR06-1
- OsOPR06-2
- OsOPR06-4
- OsOPR06-3
- OsOPR06-5
- OsOPR06-6

AA

Sub. IV

- ZmOPR08-2
- SbOPR09-1
- OsOPR01-1
- OsOPR01-2
- ZmOPR03-1
- SbOPR08-1

Sub. V

- OsOPR02-1
- SbOPR04-1
- OsOPR04-2
- OsOPR04-3
- SbOPR06-3

GCAACAAAAGCGGCATCAGGATGGCGTCTAG

TATCAGAACAAAGGCATGATTTGA

Sub. I

- PsOPR1
- PsOPR2
- PsOPR3
- OsOPR04-1
- ZmOPR02-1
- SbOPR06-2
- SbOPR06-1
- PtOPR6
- PtOPR7
- PtOPR2
- PtOPR3
- PtOPR1
- AtOPR01-1
- AtOPR01-4
- AtOPR01-5
- MtOPR05-2
- MtOPR05-7
- MtOPR05-1
- MtOPR05-3

Sub. VI

- MtOPR05-4
- MtOPR05-5
- MtOPR05-6
- PpOPR4
- PpOPR5
- PpOPR2
- PpOPR1
- SmOPR1
- SmOPR2
- SmOPR3
- SmOPR4
- SmOPR6

ACACCAAAATTGCCGAATTTTCAGCCCGTGCCACCGTGCTGTGA

Sub. II

- PpOPR3
- SmOPR5
- PpOPR6
- PtOPR4
- PtOPR5
- AtOPR02-1
- OsOPR08-1
- ZmOPR01-1
- SbOPR07-1
- ZmOPR04-1

ATCCGAGCAACTCTAG

Sub. VII

- VcOPR1
- CrOPR2
- CrOPR3
- CrOPR1
- VcOPR2

GTGACCGATAAATAG

## **Additional file 4**

Nucleotide sequences alignment of OPR genes from eleven species representing the six major lineages within the green plants: the green algae (*Chlamydomonas reinhardtii* and *Volvox carteri*), the mosses (*Physcomitrella patens*), the lycophytes (*Selaginella moellendorffii*), the gymnosperms (*Picea sitchensis*), the monocotyledoneous angiosperms (*Oryza sativa*, *Sorghum bicolor* and *Zea mays*) and the dicotyledoneous angiosperms (*Arabidopsis thaliana*, *Populus trichocarpa* and *Medicago truncatula*). Identical residues in the alignments are shaded and seven well-conserved OPR subfamilies are represented as Sub. I , II , III, IV, V , VI and VII at the left side of the alignment.
