# Supplementary material for: Phylogenetic analysis, structural evolution and functional divergence of the 12-oxo-phytodienoate acid reductase gene family in plants
Source: PubMed Central journal article supplement (PMC2688005; doi:10.1186/1471-2148-9-90), 2009-05-05
Supplement: 1471-2148-9-90-S5.pdf [file 1471-2148-9-90-S5.pdf]

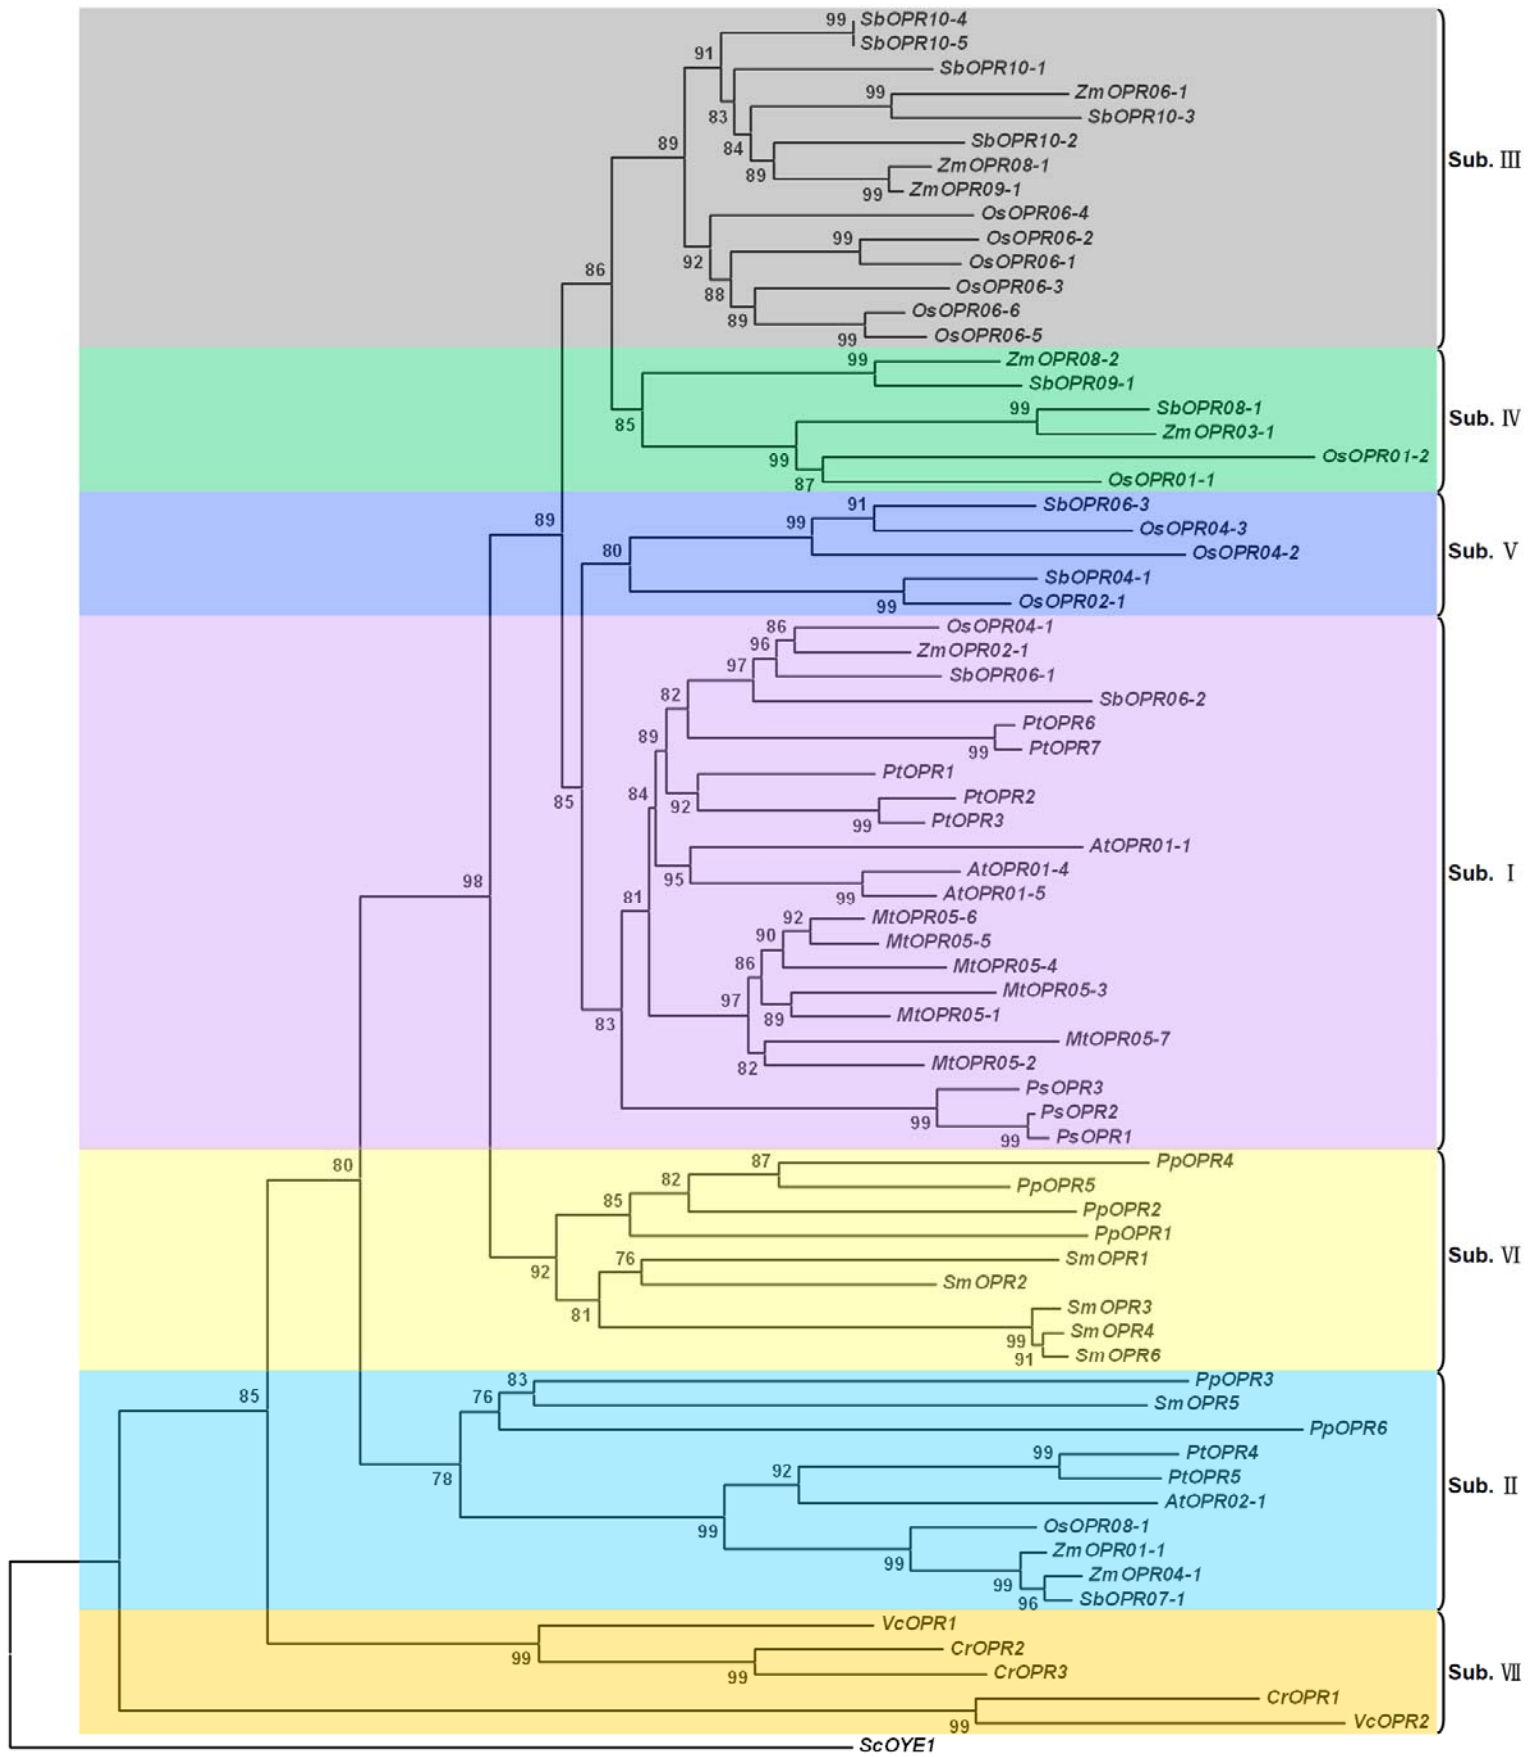

0.1

## Additional file 5

The rooted maximum-likelihood (ML) phylogenetic tree of OPR genes in 11 representative plants was inferred from the amino acid sequence alignments of the Oxidored\_FMN domain (Fig. S1) under the Jones-Taylor-Thornton (JTT) model (Jones et al., 1992), implemented in Phylip v3.68 package (Retief, 2000). The old yellow enzyme 1 (OYE1) of *Saccharomyces cerevisiae* (*ScOYE1*) (Saito et al., 1991) was selected as an out of group marker and its accession number in SWISS-PROT is Q02899. The bootstrap values from 1000 resamplings are given at each node and the branch lengths are drawn to scale. The seven conserved OPR subfamilies are represented as Sub. I , II, III, IV, V, VI and VII at the right side of the ML tree.

## References

- Jones DT, Taylor WR, Thornton JM (1992) The rapid generation of mutation data matrices from protein sequences. *Comput Appl Biosci* 8: 275-282
- Retief JD (2000) Phylogenetic analysis using PHYLIP. *Methods Mol Biol* 132: 243-258
- Saito K, Thiele DJ, Davio M, Lockridge O, Massey V (1991) The cloning and expression of a gene encoding Old Yellow Enzyme from *Saccharomyces carlsbergensis*. *J Biol Chem* 266: 20720-20724
