# Supplementary material for: Phylogenetic analysis, structural evolution and functional divergence of the 12-oxo-phytodienoate acid reductase gene family in plants
Source: BMC Evol Biol. 2009 May 5;9:90. doi: 10.1186/1471-2148-9-90 (PMC2688005; doi:10.1186/1471-2148-9-90)
Supplement: Additional file 6 — Likelihood ratio statistics (2Δℓ). This data provide represent the likelihood ratio statistical analysis of the comparisons of M0 with M3, M1a with M2a, and M7 with M8, respectively. [file 1471-2148-9-90-S6.pdf]

## Additional file 6

### Likelihood ratio statistics ( $2\Delta\ell$ )

| Comparison                                        | $2\Delta\ell$ | df | $\chi^2_{1\%}$ |
|---------------------------------------------------|---------------|----|----------------|
| M0 (one-ratio) vs. M3 (discrete)                  | 2439.82       | 4  | 13.28          |
| M1a (nearly neutral) vs. M2a (positive selection) | 807.50        | 2  | 9.21           |
| M7 (beta) vs. M8 (beta & $\omega$ )               | 673.90        | 2  | 9.21           |
